# Supplementary material for: Comparison of musculoskeletal networks of the primate forelimb
Source: Springer Nature journal article supplement (doi:10.1038/s41598-017-09566-7), 2017-08-30
Supplement: 41598_2017_9566_MOESM1_ESM.pdf [file 41598_2017_9566_MOESM1_ESM.pdf]

## **Comparison of musculoskeletal networks of the primate forelimb**

Julia Molnar\*<sup>1</sup>, Borja Esteve-Altava<sup>1,2</sup>, Campbell Rolian<sup>3</sup>, Rui Diogo<sup>1</sup>

1. Howard University College of Medicine, Numa Adams Building, 520 W Street NW, Washington, DC 20001
2. The Royal Veterinary College, Hawkshead Lane, Hatfield, Hertfordshire, AL97TA, UK
3. University of Calgary, 3330 Hospital Drive NW, Calgary, Alberta, Canada, T2N 4N1

**Table S1.** Skeletal specimens examined for this study. Institutional abbreviations: American Museum of Natural History (AMNH), Harvard University Museum of Comparative Zoology (UMCZ).

| Institution | Genus                | Species                        | Specimen       | Sex     |
|-------------|----------------------|--------------------------------|----------------|---------|
| AMNH        | <i>Saimiri</i>       | <i>boliviensis boliviensis</i> | 239872         | M       |
| AMNH        | <i>Pithecia</i>      | <i>pithecia</i>                | 149149         | M       |
| AMNH        | <i>Callithrix</i>    | <i>humeralifer</i>             | 77249          | M       |
| AMNH        | <i>Tarsius</i>       | <i>bancanus borneanus</i>      | 270            | unknown |
| AMNH        | <i>Aotus</i>         | <i>trivirgatus vociferans</i>  | 239852         | F       |
| AMNH        | <i>Lemur</i>         | <i>catta</i>                   | 48192 (NY Zoo) | F (juv) |
| AMNH        | <i>Loris</i>         | <i>lydekkerianus</i>           | 22718          | M       |
| AMNH        | <i>Nycticebus</i>    | <i>coucang</i>                 | 212953         | unknown |
| AMNH        | <i>Propithecus</i>   | <i>verreauxi</i>               | 170491         | F       |
| AMNH        | <i>Macaca</i>        | <i>nemestrina</i>              | 106563         | M       |
| AMNH        | <i>Papio</i>         | <i>hamadryas anubis</i>        | 80297          | F       |
| AMNH        | <i>Cercopithecus</i> | <i>mitis</i>                   | 52368          | F       |
| AMNH        | <i>Hylobates</i>     | <i>lar entelloides</i>         | 148207         | F       |
| AMNH        | <i>Pongo</i>         | <i>pygmaeus</i>                | 35549          | F       |
| AMNH        | <i>Pan</i>           | <i>trogodytes</i>              | 51381          | M       |
| AMNH        | <i>Gorilla</i>       | <i>gorilla</i>                 | 90194          | M       |
| AMNH        | <i>Procolobus</i>    | <i>badius</i>                  | 54279          | unknown |
| UMCZ        | <i>Cynocephalus</i>  | <i>volans</i>                  | 6261           | unknown |
| UMCZ        | <i>Cynocephalus</i>  | <i>volans</i>                  | 6262           | unknown |
| UMCZ        | <i>Cynocephalus</i>  | <i>volans</i>                  | 6263           | unknown |
| UMCZ        | <i>Cynocephalus</i>  | <i>volans</i>                  | 6264           | unknown |
| UMCZ        | <i>Tupaia</i>        | <i>glis ferruginea</i>         | 6941           | unknown |
| UMCZ        | <i>Tupaia</i>        | <i>glis olivacea</i>           | 57546          | unknown |

**Table S2.** Best partitions identified using the random walk-trap algorithm – bones only.

|                        | # Modules | Q value   | Expected error |
|------------------------|-----------|-----------|----------------|
| <i>Mus</i>             | 10        | 0.5351937 | 0.0726629      |
| <i>Tupaia</i>          | 10        | 0.5540176 | 0.0685789      |
| <i>Cynocephalus</i>    | 9         | 0.5529301 | 0.0772326      |
| <i>Lemur</i>           | 11        | 0.4989712 | 0.071227       |
| <i>Propithecus</i>     | 9         | 0.4686385 | 0.073421       |
| <i>Loris</i>           | 9         | 0.4732143 | 0.0739879      |
| <i>Nycticebus</i>      | 9         | 0.4872449 | 0.0736957      |
| <i>Tarsius</i>         | 11        | 0.509434  | 0.0714119      |
| <i>Callithrix</i>      | 11        | 0.4975995 | 0.0713297      |
| <i>Saimiri</i>         | 9         | 0.49911   | 0.0750353      |
| <i>Aotus</i>           | 11        | 0.504806  | 0.0714105      |
| <i>Pithecia</i>        | 11        | 0.4975995 | 0.0713297      |
| <i>Colobus</i>         | 11        | 0.4975207 | 0.0705468      |
| <i>Cercopithecus</i>   | 10        | 0.5035076 | 0.0697171      |
| <i>Papio</i>           | 10        | 0.5035076 | 0.0697171      |
| <i>Macaca</i>          | 10        | 0.5196109 | 0.0681343      |
| <i>Hylobates</i>       | 12        | 0.4996    | 0.0737474      |
| <i>Pongo</i>           | 12        | 0.5089546 | 0.0750526      |
| <i>Gorilla</i>         | 9         | 0.5       | 0.0797776      |
| <i>Pan troglodytes</i> | 9         | 0.5       | 0.0797776      |
| <i>Pan paniscus</i>    | 9         | 0.5       | 0.0797776      |
| <i>Homo</i>            | 9         | 0.5       | 0.0797776      |

**Table S3.** Best partitions identified using the random walk-trap algorithm – muscles + bones.

|                        | # Modules | Q value   | Expected error |
|------------------------|-----------|-----------|----------------|
| <i>Mus</i>             | 7         | 0.5572108 | 0.0311267      |
| <i>Tupaia</i>          | 9         | 0.5408615 | 0.0307808      |
| <i>Cynocephalus</i>    | 8         | 0.5237653 | 0.0294804      |
| <i>Lemur</i>           | 7         | 0.5895846 | 0.0285508      |
| <i>Propithecus</i>     | 7         | 0.5855408 | 0.0291634      |
| <i>Loris</i>           | 11        | 0.5445332 | 0.0322082      |
| <i>Nycticebus</i>      | 8         | 0.5635949 | 0.0298661      |
| <i>Tarsius</i>         | 7         | 0.5850779 | 0.0272189      |
| <i>Callithrix</i>      | 5         | 0.5612032 | 0.0285783      |
| <i>Saimiri</i>         | 6         | 0.5717486 | 0.0289213      |
| <i>Aotus</i>           | 5         | 0.579162  | 0.0279535      |
| <i>Pithecia</i>        | 4         | 0.5665765 | 0.0259911      |
| <i>Colobus</i>         | 8         | 0.5791219 | 0.0299456      |
| <i>Cercopithecus</i>   | 11        | 0.5684007 | 0.0309378      |
| <i>Papio</i>           | 11        | 0.5635484 | 0.0306035      |
| <i>Macaca</i>          | 10        | 0.5733206 | 0.0295825      |
| <i>Hylobates</i>       | 8         | 0.5582233 | 0.031073       |
| <i>Pongo</i>           | 6         | 0.5255786 | 0.031316       |
| <i>Gorilla</i>         | 8         | 0.5374631 | 0.0324379      |
| <i>Pan troglodytes</i> | 11        | 0.5391254 | 0.0317625      |
| <i>Pan paniscus</i>    | 7         | 0.5510098 | 0.0316175      |
| <i>Homo</i>            | 5         | 0.5795726 | 0.0297993      |

**Table S4.** Bone-bone connectivity modules identified in the forelimb. Colors correspond to text Figure 3.

| ID                | module | p-value | Elements                                                                                                  |
|-------------------|--------|---------|-----------------------------------------------------------------------------------------------------------|
| <i>Aotus</i>      |        |         |                                                                                                           |
| 1                 | TRUE   | 0.07865 | proximal.phalanx.5, middle.phalanx.5, distal.phalanx.5                                                    |
| 2                 | TRUE   | 0.07865 | metacarpal.1, proximal.phalanx.1, distal.phalanx.1                                                        |
| 3                 | TRUE   | 0.07865 | proximal.phalanx.4, middle.phalanx.4, distal.phalanx.4                                                    |
| 4                 | TRUE   | 0.07865 | proximal.phalanx.2, middle.phalanx.2, distal.phalanx.2                                                    |
| 5                 | TRUE   | 0.07865 | proximal.phalanx.3, middle.phalanx.3, distal.phalanx.3                                                    |
| 6                 | TRUE   | 0.07235 | humerus, radius, ulna, triquetrum, pisiform                                                               |
| 7                 | TRUE   | 0.00043 | scaphoid, lunate, trapezium, accessory.on.trap, trapezoid, centrale, capitate, metacarpal.2, metacarpal.3 |
| 8                 | TRUE   | 1       | ribs, sternum                                                                                             |
| 9                 | TRUE   | 1       | scapula, clavicle                                                                                         |
| 10                | TRUE   | 0.60187 | hamate, metacarpal.4, metacarpal.5                                                                        |
| 11                | TRUE   | 0.30854 | occipital, vertebrae                                                                                      |
| <i>Callithrix</i> |        |         |                                                                                                           |
| 1                 | TRUE   | 0.00425 | scaphoid, lunate, trapezium, accessory.on.trap, trapezoid, centrale, capitate, metacarpal.2               |
| 2                 | TRUE   | 0.07865 | metacarpal.1, proximal.phalanx.1, distal.phalanx.1                                                        |
| 3                 | TRUE   | 0.07865 | proximal.phalanx.5, middle.phalanx.5, distal.phalanx.5                                                    |
| 4                 | TRUE   | 0.07865 | proximal.phalanx.4, middle.phalanx.4, distal.phalanx.4                                                    |
| 5                 | TRUE   | 0.07865 | proximal.phalanx.2, middle.phalanx.2, distal.phalanx.2                                                    |
| 6                 | TRUE   | 0.07865 | proximal.phalanx.3, middle.phalanx.3, distal.phalanx.3                                                    |

|    |      |         |                                                  |
|----|------|---------|--------------------------------------------------|
| 7  | TRUE | 0.02938 | humerus, radius, ulna, triquetrum, pisiform      |
| 8  | TRUE | 1       | ribs, sternum                                    |
| 9  | TRUE | 0.7294  | hamate, metacarpal.3, metacarpal.4, metacarpal.5 |
| 10 | TRUE | 1       | scapula, clavicle                                |
| 11 | TRUE | 0.30854 | occipital, vertebrae                             |

*Cercopithecus*

|    |      |          |                                                                                                                    |
|----|------|----------|--------------------------------------------------------------------------------------------------------------------|
| 1  | TRUE | 0.04318  | ribs, sternum, scapula, clavicle                                                                                   |
| 2  | TRUE | 8.00E-05 | scaphoid, trapezium, trapezoid, centrale, capitate, hamate, metacarpal.2, metacarpal.3, metacarpal.4, metacarpal.5 |
| 3  | TRUE | 0.07865  | proximal.phalanx.5, middle.phalanx.5, distal.phalanx.5                                                             |
| 4  | TRUE | 0.07865  | proximal.phalanx.4, middle.phalanx.4, distal.phalanx.4                                                             |
| 5  | TRUE | 0.07865  | proximal.phalanx.2, middle.phalanx.2, distal.phalanx.2                                                             |
| 6  | TRUE | 0.07865  | proximal.phalanx.3, middle.phalanx.3, distal.phalanx.3                                                             |
| 7  | TRUE | 0.0068   | humerus, radius, ulna, lunate, triquetrum, pisiform                                                                |
| 8  | TRUE | 0.30854  | proximal.phalanx.1, distal.phalanx.1                                                                               |
| 9  | TRUE | 0.30854  | occipital, vertebrae                                                                                               |
| 10 | TRUE | 0.93319  | accessory.on.trap, metacarpal.1                                                                                    |

*Colobus*

|    |      |         |                                                                                                   |
|----|------|---------|---------------------------------------------------------------------------------------------------|
| 1  | TRUE | 0.07865 | metacarpal.1, proximal.phalanx.1, distal.phalanx.1                                                |
| 2  | TRUE | 0.07865 | proximal.phalanx.5, middle.phalanx.5, distal.phalanx.5                                            |
| 3  | TRUE | 0.07865 | proximal.phalanx.4, middle.phalanx.4, distal.phalanx.4                                            |
| 4  | TRUE | 0.07865 | proximal.phalanx.2, middle.phalanx.2, distal.phalanx.2                                            |
| 5  | TRUE | 0.07865 | proximal.phalanx.3, middle.phalanx.3, distal.phalanx.3                                            |
| 6  | TRUE | 0.00073 | scaphoid, lunate, trapezium, prepollex, trapezoid, centrale, capitate, metacarpal.2, metacarpal.3 |
| 7  | TRUE | 0.02938 | humerus, radius, ulna, triquetrum, pisiform                                                       |
| 8  | TRUE | 1       | ribs, sternum                                                                                     |
| 9  | TRUE | 1       | scapula, clavicle                                                                                 |
| 10 | TRUE | 0.82711 | hamate, metacarpal.4, metacarpal.5                                                                |
| 11 | TRUE | 0.30854 | occipital, vertebrae                                                                              |

*Cynocephalus*

|   |      |         |                                                                                      |
|---|------|---------|--------------------------------------------------------------------------------------|
| 1 | TRUE | 0.02353 | metacarpal.5, proximal.phalanx.5, middle.phalanx.5, distal.phalanx.5                 |
| 2 | TRUE | 0.02353 | metacarpal.3, proximal.phalanx.3, middle.phalanx.3, distal.phalanx.3                 |
| 3 | TRUE | 0.04318 | ribs, sternum, scapula, clavicle                                                     |
| 4 | TRUE | 0.001   | scaphoid, lunate, trapezium, trapezoid, capitate, hamate, metacarpal.2, metacarpal.4 |
| 5 | TRUE | 0.07865 | metacarpal.1, proximal.phalanx.1, distal.phalanx.1                                   |
| 6 | TRUE | 0.07865 | proximal.phalanx.2, middle.phalanx.2, distal.phalanx.2                               |
| 7 | TRUE | 0.07865 | proximal.phalanx.4, middle.phalanx.4, distal.phalanx.4                               |
| 8 | TRUE | 0.02938 | humerus, radius, ulna, triquetrum, pisiform                                          |
| 9 | TRUE | 0.30854 | occipital, vertebrae                                                                 |

*Gorilla*

|   |      |          |                                                                                                                                        |
|---|------|----------|----------------------------------------------------------------------------------------------------------------------------------------|
| 1 | TRUE | 3.00E-05 | scaphoid, lunate, triquetrum, pisiform, trapezium, trapezoid, capitate, hamate, metacarpal.2, metacarpal.3, metacarpal.4, metacarpal.5 |
| 2 | TRUE | 0.04318  | ribs, sternum, scapula, clavicle                                                                                                       |
| 3 | TRUE | 0.07865  | proximal.phalanx.5, middle.phalanx.5, distal.phalanx.5                                                                                 |
| 4 | TRUE | 0.07865  | metacarpal.1, proximal.phalanx.1, distal.phalanx.1                                                                                     |
| 5 | TRUE | 0.07865  | proximal.phalanx.2, middle.phalanx.2, distal.phalanx.2                                                                                 |
| 6 | TRUE | 0.07865  | proximal.phalanx.4, middle.phalanx.4, distal.phalanx.4                                                                                 |
| 7 | TRUE | 0.07865  | proximal.phalanx.3, middle.phalanx.3, distal.phalanx.3                                                                                 |
| 8 | TRUE | 0.09835  | humerus, radius, ulna                                                                                                                  |
| 9 | TRUE | 0.30854  | occipital, vertebrae                                                                                                                   |

*Homo*

|   |      |          |                                                                                                                                        |
|---|------|----------|----------------------------------------------------------------------------------------------------------------------------------------|
| 1 | TRUE | 3.00E-05 | trapezoid, trapezium, scaphoid, lunate, triquetrum, pisiform, hamate, capitate, metacarpal.2, metacarpal.3, metacarpal.4, metacarpal.5 |
| 2 | TRUE | 0.04318  | sternum, ribs, clavicle, scapula                                                                                                       |
| 3 | TRUE | 0.07865  | proximal.phalanx.5, middle.phalanx.5, distal.phalanx.5                                                                                 |
| 4 | TRUE | 0.07865  | metacarpal.1, proximal.phalanx.1, distal.phalanx.1                                                                                     |
| 5 | TRUE | 0.07865  | proximal.phalanx.2, middle.phalanx.2, distal.phalanx.2                                                                                 |
| 6 | TRUE | 0.07865  | proximal.phalanx.4, middle.phalanx.4, distal.phalanx.4                                                                                 |
| 7 | TRUE | 0.07865  | proximal.phalanx.3, middle.phalanx.3, distal.phalanx.3                                                                                 |
| 8 | TRUE | 0.09835  | humerus, radius, ulna                                                                                                                  |
| 9 | TRUE | 0.30854  | occipital, vertebrae                                                                                                                   |

*Hylobates*

|    |      |         |                                                                                        |
|----|------|---------|----------------------------------------------------------------------------------------|
| 1  | TRUE | 0.07865 | proximal.phalanx.5, middle.phalanx.5, distal.phalanx.5                                 |
| 2  | TRUE | 0.07865 | proximal.phalanx.4, middle.phalanx.4, distal.phalanx.4                                 |
| 3  | TRUE | 0.07865 | metacarpal.1, proximal.phalanx.1, distal.phalanx.1                                     |
| 4  | TRUE | 0.07865 | proximal.phalanx.2, middle.phalanx.2, distal.phalanx.2                                 |
| 5  | TRUE | 0.07865 | proximal.phalanx.3, middle.phalanx.3, distal.phalanx.3                                 |
| 6  | TRUE | 0.00067 | scaphoid, lunate, trapezium, trapezoid, centrale, capitate, metacarpal.2, metacarpal.3 |
| 7  | TRUE | 1       | ribs, sternum                                                                          |
| 8  | TRUE | 0.65845 | triquetrum, pisiform                                                                   |
| 9  | TRUE | 1       | scapula, clavicle                                                                      |
| 10 | TRUE | 0.60187 | hamate, metacarpal.4, metacarpal.5                                                     |
| 11 | TRUE | 0.09382 | humerus, radius, ulna                                                                  |
| 12 | TRUE | 0.30854 | occipital, vertebrae                                                                   |

*Lemur*

|   |      |         |                                                        |
|---|------|---------|--------------------------------------------------------|
| 1 | TRUE | 0.07865 | proximal.phalanx.5, middle.phalanx.5, distal.phalanx.5 |
| 2 | TRUE | 0.07865 | metacarpal.1, proximal.phalanx.1, distal.phalanx.1     |
| 3 | TRUE | 0.07865 | proximal.phalanx.4, middle.phalanx.4, distal.phalanx.4 |
| 4 | TRUE | 0.07865 | proximal.phalanx.2, middle.phalanx.2, distal.phalanx.2 |

|    |      |         |                                                                                        |
|----|------|---------|----------------------------------------------------------------------------------------|
| 5  | TRUE | 0.07865 | proximal.phalanx.3, middle.phalanx.3, distal.phalanx.3                                 |
| 6  | TRUE | 0.02938 | humerus, radius, ulna, triquetrum, pisiform                                            |
| 7  | TRUE | 1       | ribs, sternum                                                                          |
| 8  | TRUE | 0.001   | scaphoid, lunate, trapezium, trapezoid, centrale, capitate, metacarpal.2, metacarpal.3 |
| 9  | TRUE | 1       | scapula, clavicle                                                                      |
| 10 | TRUE | 0.82711 | hamate, metacarpal.4, metacarpal.5                                                     |
| 11 | TRUE | 0.30854 | occipital, vertebrae                                                                   |

*Loris*

|   |      |         |                                                                                                            |
|---|------|---------|------------------------------------------------------------------------------------------------------------|
| 1 | TRUE | 0.04318 | ribs, sternum, scapula, clavicle                                                                           |
| 2 | TRUE | 0.03366 | humerus, radius, ulna, lunate, triquetrum, pisiform, hamate                                                |
| 3 | TRUE | 0.00125 | scaphoid, trapezium, trapezoid, centrale, capitate, metacarpal.2, metacarpal.3, metacarpal.4, metacarpal.5 |
| 4 | TRUE | 0.07865 | proximal.phalanx.5, middle.phalanx.5, distal.phalanx.5                                                     |
| 5 | TRUE | 0.07865 | proximal.phalanx.4, middle.phalanx.4, distal.phalanx.4                                                     |
| 6 | TRUE | 0.07865 | metacarpal.1, proximal.phalanx.1, distal.phalanx.1                                                         |
| 7 | TRUE | 0.07865 | proximal.phalanx.2, middle.phalanx.2, distal.phalanx.2                                                     |
| 8 | TRUE | 0.07865 | proximal.phalanx.3, middle.phalanx.3, distal.phalanx.3                                                     |
| 9 | TRUE | 0.30854 | occipital, vertebrae                                                                                       |

*Macaca*

|    |      |         |                                                                                                                 |
|----|------|---------|-----------------------------------------------------------------------------------------------------------------|
| 1  | TRUE | 0.04318 | ribs, sternum, scapula, clavicle                                                                                |
| 2  | TRUE | 0.00086 | scaphoid, trapezium, accessory.on.trap, trapezoid, centrale, capitate, metacarpal.1, metacarpal.2, metacarpal.3 |
| 3  | TRUE | 0.07865 | proximal.phalanx.5, middle.phalanx.5, distal.phalanx.5                                                          |
| 4  | TRUE | 0.07865 | proximal.phalanx.4, middle.phalanx.4, distal.phalanx.4                                                          |
| 5  | TRUE | 0.07865 | proximal.phalanx.2, middle.phalanx.2, distal.phalanx.2                                                          |
| 6  | TRUE | 0.07865 | proximal.phalanx.3, middle.phalanx.3, distal.phalanx.3                                                          |
| 7  | TRUE | 0.01052 | humerus, radius, ulna, lunate, triquetrum, pisiform                                                             |
| 8  | TRUE | 0.60187 | hamate, metacarpal.4, metacarpal.5                                                                              |
| 9  | TRUE | 0.30854 | proximal.phalanx.1, distal.phalanx.1                                                                            |
| 10 | TRUE | 0.30854 | occipital, vertebrae                                                                                            |

*Mus*

|   |      |         |                                                                                                   |
|---|------|---------|---------------------------------------------------------------------------------------------------|
| 1 | TRUE | 0.04318 | sternum, ribs, clavicle, scapula                                                                  |
| 2 | TRUE | 0.08062 | humerus, radius, ulna, triquetrum, pisiform                                                       |
| 3 | TRUE | 0.07865 | proximal.phalanx.5, middle.phalanx.5, distal.phalanx.5                                            |
| 4 | TRUE | 0.07865 | proximal.phalanx.4, middle.phalanx.4, distal.phalanx.4                                            |
| 5 | TRUE | 0.07865 | proximal.phalanx.2, middle.phalanx.2, distal.phalanx.2                                            |
| 6 | TRUE | 0.07865 | proximal.phalanx.3, middle.phalanx.3, distal.phalanx.3                                            |
| 7 | TRUE | 0.00689 | trapezoid, trapezium, central.bone, scapholunate, falciform, capitate, metacarpal.1, metacarpal.2 |
| 8 | TRUE | 0.14247 | hamate, metacarpal.3, metacarpal.4, metacarpal.5                                                  |

|    |      |         |                                      |
|----|------|---------|--------------------------------------|
| 9  | TRUE | 0.30854 | proximal.phalanx.1, distal.phalanx.1 |
| 10 | TRUE | 0.30854 | occipital, vertebrae                 |

*Nycticebus*

|   |      |          |                                                                                                                            |
|---|------|----------|----------------------------------------------------------------------------------------------------------------------------|
| 1 | TRUE | 0.04318  | ribs, sternum, scapula, clavicle                                                                                           |
| 2 | TRUE | 0.07865  | proximal.phalanx.5, middle.phalanx.5, distal.phalanx.5                                                                     |
| 3 | TRUE | 0.07865  | proximal.phalanx.2, middle.phalanx.2, distal.phalanx.2                                                                     |
| 4 | TRUE | 0.07865  | proximal.phalanx.4, middle.phalanx.4, distal.phalanx.4                                                                     |
| 5 | TRUE | 0.07865  | metacarpal.1, proximal.phalanx.1, distal.phalanx.1                                                                         |
| 6 | TRUE | 0.07865  | proximal.phalanx.3, middle.phalanx.3, distal.phalanx.3                                                                     |
| 7 | TRUE | 3.00E-05 | scaphoid, lunate, trapezium, trapezoid, centrale, capitate, hamate, metacarpal.2, metacarpal.3, metacarpal.4, metacarpal.5 |
| 8 | TRUE | 0.02938  | humerus, radius, ulna, triquetrum, pisiform                                                                                |
| 9 | TRUE | 0.30854  | occipital, vertebrae                                                                                                       |

*Pan paniscus*

|   |      |          |                                                                                                                                        |
|---|------|----------|----------------------------------------------------------------------------------------------------------------------------------------|
| 1 | TRUE | 3.00E-05 | scaphoid, lunate, triquetrum, pisiform, trapezium, trapezoid, capitate, hamate, metacarpal.2, metacarpal.3, metacarpal.4, metacarpal.5 |
| 2 | TRUE | 0.04318  | ribs, sternum, scapula, clavicle                                                                                                       |
| 3 | TRUE | 0.07865  | proximal.phalanx.5, middle.phalanx.5, distal.phalanx.5                                                                                 |
| 4 | TRUE | 0.07865  | metacarpal.1, proximal.phalanx.1, distal.phalanx.1                                                                                     |
| 5 | TRUE | 0.07865  | proximal.phalanx.2, middle.phalanx.2, distal.phalanx.2                                                                                 |
| 6 | TRUE | 0.07865  | proximal.phalanx.4, middle.phalanx.4, distal.phalanx.4                                                                                 |
| 7 | TRUE | 0.07865  | proximal.phalanx.3, middle.phalanx.3, distal.phalanx.3                                                                                 |
| 8 | TRUE | 0.09835  | humerus, radius, ulna                                                                                                                  |
| 9 | TRUE | 0.30854  | occipital, vertebrae                                                                                                                   |

*Pan paniscus*

|   |      |          |                                                                                                                                        |
|---|------|----------|----------------------------------------------------------------------------------------------------------------------------------------|
| 1 | TRUE | 3.00E-05 | scaphoid, lunate, triquetrum, pisiform, trapezium, trapezoid, capitate, hamate, metacarpal.2, metacarpal.3, metacarpal.4, metacarpal.5 |
| 2 | TRUE | 0.04318  | ribs, sternum, scapula, clavicle                                                                                                       |
| 3 | TRUE | 0.07865  | proximal.phalanx.5, middle.phalanx.5, distal.phalanx.5                                                                                 |
| 4 | TRUE | 0.07865  | metacarpal.1, proximal.phalanx.1, distal.phalanx.1                                                                                     |
| 5 | TRUE | 0.07865  | proximal.phalanx.2, middle.phalanx.2, distal.phalanx.2                                                                                 |
| 6 | TRUE | 0.07865  | proximal.phalanx.4, middle.phalanx.4, distal.phalanx.4                                                                                 |
| 7 | TRUE | 0.07865  | proximal.phalanx.3, middle.phalanx.3, distal.phalanx.3                                                                                 |
| 8 | TRUE | 0.09835  | humerus, radius, ulna                                                                                                                  |
| 9 | TRUE | 0.30854  | occipital, vertebrae                                                                                                                   |

*Papio*

|   |      |          |                                                                                                                    |
|---|------|----------|--------------------------------------------------------------------------------------------------------------------|
| 1 | TRUE | 0.04318  | ribs, sternum, scapula, clavicle                                                                                   |
| 2 | TRUE | 8.00E-05 | scaphoid, trapezium, trapezoid, centrale, capitate, hamate, metacarpal.2, metacarpal.3, metacarpal.4, metacarpal.5 |
| 3 | TRUE | 0.07865  | proximal.phalanx.5, middle.phalanx.5, distal.phalanx.5                                                             |
| 4 | TRUE | 0.07865  | proximal.phalanx.4, middle.phalanx.4, distal.phalanx.4                                                             |

|    |      |         |                                                        |
|----|------|---------|--------------------------------------------------------|
| 5  | TRUE | 0.07865 | proximal.phalanx.2, middle.phalanx.2, distal.phalanx.2 |
| 6  | TRUE | 0.07865 | proximal.phalanx.3, middle.phalanx.3, distal.phalanx.3 |
| 7  | TRUE | 0.0068  | humerus, radius, ulna, lunate, triquetrum, pisiform    |
| 8  | TRUE | 0.30854 | proximal.phalanx.1, distal.phalanx.1                   |
| 9  | TRUE | 0.30854 | occipital, vertebrae                                   |
| 10 | TRUE | 0.93319 | accessory.on.trap, metacarpal.1                        |

*Pithecia*

|    |      |         |                                                                                             |
|----|------|---------|---------------------------------------------------------------------------------------------|
| 1  | TRUE | 0.00425 | scaphoid, lunate, trapezium, accessory.on.trap, trapezoid, centrale, capitate, metacarpal.2 |
| 2  | TRUE | 0.07865 | metacarpal.1, proximal.phalanx.1, distal.phalanx.1                                          |
| 3  | TRUE | 0.07865 | proximal.phalanx.5, middle.phalanx.5, distal.phalanx.5                                      |
| 4  | TRUE | 0.07865 | proximal.phalanx.4, middle.phalanx.4, distal.phalanx.4                                      |
| 5  | TRUE | 0.07865 | proximal.phalanx.2, middle.phalanx.2, distal.phalanx.2                                      |
| 6  | TRUE | 0.07865 | proximal.phalanx.3, middle.phalanx.3, distal.phalanx.3                                      |
| 7  | TRUE | 0.02938 | humerus, radius, ulna, triquetrum, pisiform                                                 |
| 8  | TRUE | 1       | ribs, sternum                                                                               |
| 9  | TRUE | 0.7294  | hamate, metacarpal.3, metacarpal.4, metacarpal.5                                            |
| 10 | TRUE | 1       | scapula, clavicle                                                                           |
| 11 | TRUE | 0.30854 | occipital, vertebrae                                                                        |

*Pongo*

|    |      |         |                                                                                        |
|----|------|---------|----------------------------------------------------------------------------------------|
| 1  | TRUE | 0.07865 | proximal.phalanx.5, middle.phalanx.5, distal.phalanx.5                                 |
| 2  | TRUE | 0.07865 | proximal.phalanx.4, middle.phalanx.4, distal.phalanx.4                                 |
| 3  | TRUE | 0.07865 | metacarpal.1, proximal.phalanx.1, distal.phalanx.1                                     |
| 4  | TRUE | 0.07865 | proximal.phalanx.2, middle.phalanx.2, distal.phalanx.2                                 |
| 5  | TRUE | 0.07865 | proximal.phalanx.3, middle.phalanx.3, distal.phalanx.3                                 |
| 6  | TRUE | 0.00067 | scaphoid, lunate, trapezium, trapezoid, centrale, capitate, metacarpal.2, metacarpal.3 |
| 7  | TRUE | 1       | ribs, sternum                                                                          |
| 8  | TRUE | 1       | scapula, clavicle                                                                      |
| 9  | TRUE | 0.65845 | triquetrum, pisiform                                                                   |
| 10 | TRUE | 0.60187 | hamate, metacarpal.4, metacarpal.5                                                     |
| 11 | TRUE | 0.09835 | humerus, radius, ulna                                                                  |
| 12 | TRUE | 0.30854 | occipital, vertebrae                                                                   |

*Propithecus*

|   |      |          |                                                                                                                                               |
|---|------|----------|-----------------------------------------------------------------------------------------------------------------------------------------------|
| 1 | TRUE | 0.04318  | ribs, sternum, scapula, clavicle                                                                                                              |
| 2 | TRUE | 2.00E-05 | scaphoid, lunate, trapezium, accessory.on.trap, trapezoid, centrale, capitate, hamate, metacarpal.2, metacarpal.3, metacarpal.4, metacarpal.5 |
| 3 | TRUE | 0.07865  | metacarpal.1, proximal.phalanx.1, distal.phalanx.1                                                                                            |
| 4 | TRUE | 0.07865  | proximal.phalanx.5, middle.phalanx.5, distal.phalanx.5                                                                                        |
| 5 | TRUE | 0.07865  | proximal.phalanx.4, middle.phalanx.4, distal.phalanx.4                                                                                        |
| 6 | TRUE | 0.07865  | proximal.phalanx.2, middle.phalanx.2, distal.phalanx.2                                                                                        |



|   |      |         |                                                        |
|---|------|---------|--------------------------------------------------------|
| 7 | TRUE | 0.07865 | proximal.phalanx.3, middle.phalanx.3, distal.phalanx.3 |
| 8 | TRUE | 0.02938 | humerus, radius, ulna, triquetrum, pisiform            |
| 9 | TRUE | 0.30854 | occipital, vertebrae                                   |

*Saimiri*

|   |      |          |                                                                                                                            |
|---|------|----------|----------------------------------------------------------------------------------------------------------------------------|
| 1 | TRUE | 0.04318  | ribs, sternum, scapula, clavicle                                                                                           |
| 2 | TRUE | 3.00E-05 | scaphoid, lunate, trapezium, centrale, trapezoid, capitate, hamate, metacarpal.2, metacarpal.3, metacarpal.4, metacarpal.5 |
| 3 | TRUE | 0.07865  | proximal.phalanx.5, middle.phalanx.5, distal.phalanx.5                                                                     |
| 4 | TRUE | 0.07865  | proximal.phalanx.4, middle.phalanx.4, distal.phalanx.4                                                                     |
| 5 | TRUE | 0.07865  | metacarpal.1, proximal.phalanx.1, distal.phalanx.1                                                                         |
| 6 | TRUE | 0.07865  | proximal.phalanx.2, middle.phalanx.2, distal.phalanx.2                                                                     |
| 7 | TRUE | 0.07865  | proximal.phalanx.3, middle.phalanx.3, distal.phalanx.3                                                                     |
| 8 | TRUE | 0.02938  | humerus, radius, ulna, triquetrum, pisiform                                                                                |
| 9 | TRUE | 0.30854  | occipital, vertebrae                                                                                                       |

*Tarsius*

|    |      |         |                                                                                |
|----|------|---------|--------------------------------------------------------------------------------|
| 1  | TRUE | 0.07865 | proximal.phalanx.5, middle.phalanx.5, distal.phalanx.5                         |
| 2  | TRUE | 0.07865 | metacarpal.1, proximal.phalanx.1, distal.phalanx.1                             |
| 3  | TRUE | 0.07865 | proximal.phalanx.4, middle.phalanx.4, distal.phalanx.4                         |
| 4  | TRUE | 0.07865 | proximal.phalanx.2, middle.phalanx.2, distal.phalanx.2                         |
| 5  | TRUE | 0.07865 | proximal.phalanx.3, middle.phalanx.3, distal.phalanx.3                         |
| 6  | TRUE | 0.19042 | lunate, triquetrum, hamate, metacarpal.4, metacarpal.5                         |
| 7  | TRUE | 0.08602 | humerus, radius, ulna, pisiform                                                |
| 8  | TRUE | 1       | ribs, sternum                                                                  |
| 9  | TRUE | 0.00208 | scaphoid, trapezium, trapezoid, centrale, capitate, metacarpal.2, metacarpal.3 |
| 10 | TRUE | 1       | scapula, clavicle                                                              |
| 11 | TRUE | 0.30854 | occipital, vertebrae                                                           |

*Tupaia*

|    |      |         |                                                                                    |
|----|------|---------|------------------------------------------------------------------------------------|
| 1  | TRUE | 0.04318 | ribs, sternum, scapula, clavicle                                                   |
| 2  | TRUE | 0.07865 | proximal.phalanx.5, middle.phalanx.5, distal.phalanx.5                             |
| 3  | TRUE | 0.07865 | proximal.phalanx.4, middle.phalanx.4, distal.phalanx.4                             |
| 4  | TRUE | 0.07865 | proximal.phalanx.2, middle.phalanx.2, distal.phalanx.2                             |
| 5  | TRUE | 0.07865 | proximal.phalanx.3, middle.phalanx.3, distal.phalanx.3                             |
| 6  | TRUE | 0.00754 | humerus, radius, ulna, scapholunate, triquetrum, pisiform                          |
| 7  | TRUE | 0.00137 | trapezium, centrale, trapezoid, capitate, metacarpal.1, metacarpal.2, metacarpal.3 |
| 8  | TRUE | 0.25249 | hamate, metacarpal.4, metacarpal.5                                                 |
| 9  | TRUE | 0.30854 | proximal.phalanx.1, distal.phalanx.1                                               |
| 10 | TRUE | 0.30854 | occipital, vertebrae                                                               |

**Table S5.** Muscle-bone connectivity modules identified in the forelimb. Colors correspond to text Figures 4-5.

| ID                   | module | p-value | Elements                                                                                                                                                                                                                                                                                                                                                                                                                                                                                          |
|----------------------|--------|---------|---------------------------------------------------------------------------------------------------------------------------------------------------------------------------------------------------------------------------------------------------------------------------------------------------------------------------------------------------------------------------------------------------------------------------------------------------------------------------------------------------|
| <i>Aotus</i>         |        |         |                                                                                                                                                                                                                                                                                                                                                                                                                                                                                                   |
| 1                    | TRUE   | 0       | scaphoid, lunate, trapezium, accessory.on.trap, trapezoid, centrale, capitate, metacarpal.1, proximal.phalanx.1, metacarpal.2, proximal.phalanx.2, metacarpal.3, proximal.phalanx.3, flexor.carpi.radialis, contrahens.digitorum.2, adductor.pollicis, interosseus.dorsalis.1, interosseus.dorsalis.2, interosseus.dorsalis.3, interosseus.palmaris.1, flexor.pollicis.brevis, opponens.pollicis, abductor.pollicis.brevis, extensor.carpi.radialis.longus, extensor.carpi.radialis.brevis        |
| 2                    | TRUE   | 0.00174 | occipital, vertebrae, ribs, sternum, clavicle, serratus.anterior, rhomboideus.major, rhomboideus.occipitalis, levator.scapulae, levator.claviculae, subclavius, pectoralis.major                                                                                                                                                                                                                                                                                                                  |
| 3                    | TRUE   | 0.00012 | triquetrum, pisiform, hamate, metacarpal.4, proximal.phalanx.4, metacarpal.5, proximal.phalanx.5, flexor.carpi.ulnaris, contrahens.digitorum.4, contrahens.digitorum.5, interosseus.dorsalis.4, interosseus.palmaris.2, interosseus.palmaris.3, flexor.digiti.minimi.brevis, opponens.digiti.minimi, abductor.digiti.minimi, extensor.carpi.ulnaris                                                                                                                                               |
| 4                    | TRUE   | 0       | scapula, humerus, radius, ulna, pectoralis.minor, panniculus.carnosus, infraspinatus, supraspinatus, deltoideus., teres.minor, subscapularis, teres.major, latissimus.dorsi, dorsoepitrochlearis, triceps.brachii, brachialis, biceps.brachii, coracobrachialis, pronator.quadratus, palmaris.longus, epitrochleoanconeus, pronator.teres, brachioradialis, supinator, anconeus, abductor.pollicis.longus                                                                                         |
| 5                    | TRUE   | 0       | distal.phalanx.1, middle.phalanx.2, distal.phalanx.2, middle.phalanx.3, distal.phalanx.3, middle.phalanx.4, distal.phalanx.4, middle.phalanx.5, distal.phalanx.5, flexor.digitorum.profundus, flexor.digitorum.superficialis, lumbrical.1, lumbrical.2, lumbrical.3, lumbrical.4, extensor.digitorum, extensor.digiti.minimi, extensor.indicis, extensor.pollicis.longus                                                                                                                          |
| <i>Callithrix</i>    |        |         |                                                                                                                                                                                                                                                                                                                                                                                                                                                                                                   |
| 1                    | TRUE   | 0       | scaphoid, lunate, trapezium, accessory.on.trap, trapezoid, centrale, capitate, metacarpal.1, proximal.phalanx.1, metacarpal.2, proximal.phalanx.2, metacarpal.3, proximal.phalanx.3, flexor.carpi.radialis, contrahens.digitorum.2, adductor.pollicis, interosseus.dorsalis.1, interosseus.dorsalis.2, interosseus.dorsalis.3, interosseus.palmaris.1, flexor.pollicis.brevis, abductor.pollicis.brevis, extensor.carpi.radialis.longus, extensor.carpi.radialis.brevis, abductor.pollicis.longus |
| 2                    | TRUE   | 0.00322 | occipital, vertebrae, ribs, sternum, clavicle, serratus.anterior, rhomboideus.major, rhomboideus.minor, rhomboideus.occipitalis, levator.scapulae, levator.claviculae, subclavius, pectoralis.major                                                                                                                                                                                                                                                                                               |
| 3                    | TRUE   | 0.00196 | hamate, metacarpal.4, proximal.phalanx.4, metacarpal.5, proximal.phalanx.5, contrahens.digitorum.4, contrahens.digitorum.5, interosseus.dorsalis.4, interosseus.palmaris.2, interosseus.palmaris.3, flexor.digiti.minimi.brevis, opponens.digiti.minimi, extensor.carpi.ulnaris                                                                                                                                                                                                                   |
| 4                    | TRUE   | 0       | scapula, humerus, radius, ulna, triquetrum, pisiform, pectoralis.minor, panniculus.carnosus, infraspinatus, supraspinatus, deltoideus., teres.minor, subscapularis, teres.major, latissimus.dorsi, dorsoepitrochlearis, triceps.brachii, brachialis, biceps.brachii, coracobrachialis, pronator.quadratus, palmaris.longus, flexor.carpi.ulnaris, epitrochleoanconeus, pronator.teres, brachioradialis, supinator, anconeus                                                                       |
| 5                    | TRUE   | 0       | distal.phalanx.1, middle.phalanx.2, distal.phalanx.2, middle.phalanx.3, distal.phalanx.3, middle.phalanx.4, distal.phalanx.4, middle.phalanx.5, distal.phalanx.5, flexor.digitorum.profundus, flexor.digitorum.superficialis, lumbrical.1, lumbrical.2, lumbrical.3, lumbrical.4, abductor.digiti.minimi, extensor.digitorum, extensor.digiti.minimi, extensor.indicis, extensor.pollicis.longus                                                                                                  |
| <i>Cercopithecus</i> |        |         |                                                                                                                                                                                                                                                                                                                                                                                                                                                                                                   |
| 1                    | TRUE   | 0.01493 | hamate, metacarpal.4, proximal.phalanx.4, metacarpal.5, contrahens.digitorum.4, flexor.brevis.profundus.7, flexor.brevis.profundus.8, intermetacarpal.4, opponens.digiti.minimi,                                                                                                                                                                                                                                                                                                                  |

| extensor.carpi.ulnaris |      |          |                                                                                                                                                                                                                                                                                                                                                                     |
|------------------------|------|----------|---------------------------------------------------------------------------------------------------------------------------------------------------------------------------------------------------------------------------------------------------------------------------------------------------------------------------------------------------------------------|
| 2                      | TRUE | 1.00E-05 | scapula, humerus, radius, ulna, rhomboideus.minor, panniculus.carnosus, infraspinatus, supraspinatus, deltoideus., teres.minor, subscapularis, teres.major, triceps.brachii, brachialis, biceps.brachii, coracobrachialis, pronator.quadratus, palmaris.longus, epitrochleoanconeus, pronator.teres, brachioradialis, supinator, anconeus, abductor.pollicis.longus |
| 3                      | TRUE | 0.02655  | occipital, vertebrae, rhomboideus.major, rhomboideus.occipitalis, levator.scapulae, levator.claviculae, latissimus.dorsi, dorsoepitrochlearis                                                                                                                                                                                                                       |
| 4                      | TRUE | 0.05137  | proximal.phalanx.1, distal.phalanx.1, adductor.pollicis, flexor.brevis.profundus.2, flexor.pollicis.brevis, abductor.pollicis.brevis, extensor.pollicis.longus                                                                                                                                                                                                      |
| 5                      | TRUE | 0.09609  | metacarpal.2, proximal.phalanx.2, flexor.carpi.radialis, contrahens.digitorum.2, flexor.brevis.profundus.3, flexor.brevis.profundus.4, intermetacarpal.1, extensor.carpi.radialis.longus                                                                                                                                                                            |
| 6                      | TRUE | 0        | middle.phalanx.2, distal.phalanx.2, middle.phalanx.3, distal.phalanx.3, middle.phalanx.4, distal.phalanx.4, middle.phalanx.5, distal.phalanx.5, flexor.digitorum.profundus, flexor.digitorum.superficialis, lumbrical.1, lumbrical.2, lumbrical.3, lumbrical.4, extensor.digitorum, extensor.digiti.minimi, extensor.indicis                                        |
| 7                      | TRUE | 0.06416  | scaphoid, lunate, triquetrum, pisiform, trapezoid, centrale, capitate, flexor.carpi.ulnaris                                                                                                                                                                                                                                                                         |
| 8                      | TRUE | 0.17233  | proximal.phalanx.5, contrahens.digitorum.5, flexor.brevis.profundus.9, flexor.digiti.minimi.brevis, abductor.digiti.minimi                                                                                                                                                                                                                                          |
| 9                      | TRUE | 0.01308  | ribs, sternum, clavicle, serratus.anterior, subclavius, pectoralis.major, pectoralis.minor                                                                                                                                                                                                                                                                          |
| 10                     | TRUE | 0.03178  | metacarpal.3, proximal.phalanx.3, flexor.brevis.profundus.5, flexor.brevis.profundus.6, intermetacarpal.2, intermetacarpal.3, extensor.carpi.radialis.brevis                                                                                                                                                                                                        |
| 11                     | TRUE | 0.44047  | trapezium, accessory.on.trap, metacarpal.1, opponens.pollicis                                                                                                                                                                                                                                                                                                       |

#### Colobus

|   |      |          |                                                                                                                                                                                                                                                                                                                                                                          |
|---|------|----------|--------------------------------------------------------------------------------------------------------------------------------------------------------------------------------------------------------------------------------------------------------------------------------------------------------------------------------------------------------------------------|
| 1 | TRUE | 0.00012  | scaphoid, lunate, trapezium, prepollex, trapezoid, centrale, capitate, metacarpal.1, metacarpal.2, proximal.phalanx.2, flexor.carpi.radialis, contrahens.digitorum.2, flexor.brevis.profundus.3, flexor.brevis.profundus.4, intermetacarpal.1, opponens.pollicis, extensor.carpi.radialis.longus, abductor.pollicis.longus                                               |
| 2 | TRUE | 3.00E-04 | occipital, vertebrae, ribs, sternum, clavicle, serratus.anterior, rhomboideus, rhomboideus.occipitalis, levator.scapulae, levator.claviculae, subclavius, pectoralis.major, pectoralis.minor, latissimus.dorsi, dorsoepitrochlearis                                                                                                                                      |
| 3 | TRUE | 0.01144  | triquetrum, pisiform, hamate, metacarpal.5, proximal.phalanx.5, flexor.carpi.ulnaris, contrahens.digitorum.5, flexor.brevis.profundus.9, flexor.digiti.minimi.brevis, opponens.digiti.minimi, abductor.digiti.minimi, extensor.carpi.ulnaris                                                                                                                             |
| 4 | TRUE | 0        | distal.phalanx.1, middle.phalanx.2, distal.phalanx.2, middle.phalanx.3, distal.phalanx.3, middle.phalanx.4, distal.phalanx.4, middle.phalanx.5, distal.phalanx.5, flexor.digitorum.profundus, flexor.digitorum.superficialis, lumbrical.1, lumbrical.2, lumbrical.3, lumbrical.4, extensor.digitorum, extensor.digiti.minimi, extensor.indicis, extensor.pollicis.longus |
| 5 | TRUE | 3.00E-05 | scapula, humerus, radius, ulna, panniculus.carnosus, infraspinatus, supraspinatus, deltoideus., teres.minor, subscapularis, teres.major, triceps.brachii, brachialis, biceps.brachii, coracobrachialis, pronator.quadratus, palmaris.longus, epitrochleoanconeus, pronator.teres, brachioradialis, supinator, anconeus                                                   |
| 6 | TRUE | 0.06901  | metacarpal.4, proximal.phalanx.4, contrahens.digitorum.4, flexor.brevis.profundus.7, flexor.brevis.profundus.8, intermetacarpal.4                                                                                                                                                                                                                                        |
| 7 | TRUE | 0.17645  | proximal.phalanx.1, adductor.pollicis, flexor.pollicis.brevis, abductor.pollicis.brevis                                                                                                                                                                                                                                                                                  |
| 8 | TRUE | 0.02747  | metacarpal.3, proximal.phalanx.3, flexor.brevis.profundus.5, flexor.brevis.profundus.6, intermetacarpal.2, intermetacarpal.3, extensor.carpi.radialis.brevis                                                                                                                                                                                                             |

#### Cynocephalus

|   |      |          |                                                                                                                                                                                                                                                                                                                                                                             |
|---|------|----------|-----------------------------------------------------------------------------------------------------------------------------------------------------------------------------------------------------------------------------------------------------------------------------------------------------------------------------------------------------------------------------|
| 1 | TRUE | 0.00045  | scaphoid, lunate, pisiform, trapezium, trapezoid, capitate, hamate, metacarpal.1, proximal.phalanx.1, distal.phalanx.1, flexor.carpi.radialis, adductor.pollicis, flexor.pollicis.brevis, abductor.pollicis.brevis, extensor.carpi.radialis.longus, extensor.pollicis.longus, abductor.pollicis.longus                                                                      |
| 2 | TRUE | 0.05755  | metacarpal.3, proximal.phalanx.3, metacarpal.4, proximal.phalanx.4, interosseus.dorsalis.2, interosseus.dorsalis.3, interosseus.dorsalis.4, interosseus.palmaris.2, extensor.carpi.radialis.brevis                                                                                                                                                                          |
| 3 | TRUE | 1.00E-05 | scapula, humerus, radius, ulna, panniculus.carnosus, infraspinatus, supraspinatus, deltoideus.scapularis, teres.minor, subscapularis, teres.major, latissimus.dorsi, triceps.brachii, dorsoepitrochlearis, brachialis, biceps.brachii, coracobrachialis, palmaris.longus, epitrochleoanconeus, pronator.teres, brachioradialis, supinator, extensor.carpi.ulnaris, anconeus |
| 4 | TRUE | 0.08085  | triquetrum, metacarpal.5, proximal.phalanx.5, flexor.carpi.ulnaris, flexor.brevis.digitorum.manus, contrahens.digitorum.5, interosseus.palmaris.3, flexor.digiti.minimi.brevis, abductor.digiti.minimi                                                                                                                                                                      |
| 5 | TRUE | 0.30362  | occipital, vertebrae, rhomboideus, levator.scapulae, levator.claviculae                                                                                                                                                                                                                                                                                                     |
| 6 | TRUE | 0.2289   | metacarpal.2, proximal.phalanx.2, contrahens.digitorum.2, interosseus.dorsalis.1, interosseus.palmaris.1                                                                                                                                                                                                                                                                    |
| 7 | TRUE | 0        | middle.phalanx.2, distal.phalanx.2, middle.phalanx.3, distal.phalanx.3, middle.phalanx.4, distal.phalanx.4, middle.phalanx.5, distal.phalanx.5, flexor.digitorum.profundus, flexor.digitorum.superficialis, lumbrical.1, lumbrical.2, lumbrical.3, lumbrical.4, lumbrical.5, lumbrical.6, lumbrical.7, extensor.digitorum, extensor.digiti.minimi, extensor.indicis         |
| 8 | TRUE | 0.00563  | ribs, sternum, clavicle, serratus.anterior, subclavius, pectoralis.major, pectoralis.minor, deltoideus.acromialis.et.clavicularis                                                                                                                                                                                                                                           |

#### Gorilla

|   |      |         |                                                                                                                                                                                                                                                                                                                                          |
|---|------|---------|------------------------------------------------------------------------------------------------------------------------------------------------------------------------------------------------------------------------------------------------------------------------------------------------------------------------------------------|
| 1 | TRUE | 0.00079 | occipital, vertebrae, ribs, sternum, clavicle, serratus.anterior, rhomboideus, levator.scapulae, levator.claviculae, subclavius, pectoralis.major, pectoralis.minor, latissimus.dorsi, dorsoepitrochlearis                                                                                                                               |
| 2 | TRUE | 0.00382 | scaphoid, lunate, trapezoid, capitate, hamate, metacarpal.2, metacarpal.3, proximal.phalanx.3, middle.phalanx.3, distal.phalanx.3, flexor.carpi.radialis, lumbrical.2, interosseus.dorsalis.2, interosseus.dorsalis.3, extensor.carpi.radialis.longus, extensor.carpi.radialis.brevis, extensor.digitorum                                |
| 3 | TRUE | 0.00836 | metacarpal.5, proximal.phalanx.5, middle.phalanx.5, distal.phalanx.5, lumbrical.4, interosseus.palmaris.4, flexor.digiti.minimi.brevis, opponens.digiti.minimi, extensor.carpi.ulnaris, extensor.digiti.minimi                                                                                                                           |
| 4 | TRUE | 0.00062 | scapula, humerus, radius, ulna, infraspinatus, supraspinatus, deltoideus., teres.minor, subscapularis, teres.major, triceps.brachii, brachialis, biceps.brachii, coracobrachialis, pronator.quadratus, flexor.digitorum.profundus, flexor.digitorum.superficialis, palmaris.longus, pronator.teres, brachioradialis, supinator, anconeus |
| 5 | TRUE | 0.00083 | trapezium, metacarpal.1, proximal.phalanx.1, distal.phalanx.1, adductor.pollicis, flexor.brevis.profundus.2, flexor.pollicis.brevis, opponens.pollicis, abductor.pollicis.brevis, extensor.pollicis.longus, abductor.pollicis.longus                                                                                                     |
| 6 | TRUE | 0.67553 | triquetrum, pisiform, flexor.carpi.ulnaris, abductor.digiti.minimi                                                                                                                                                                                                                                                                       |
| 7 | TRUE | 0.00988 | metacarpal.4, proximal.phalanx.4, middle.phalanx.4, distal.phalanx.4, lumbrical.3, interosseus.palmaris.2, interosseus.dorsalis.4                                                                                                                                                                                                        |

#### Homo

|   |      |          |                                                                                                                                                                                                                                                                                                                              |
|---|------|----------|------------------------------------------------------------------------------------------------------------------------------------------------------------------------------------------------------------------------------------------------------------------------------------------------------------------------------|
| 1 | TRUE | 0.00196  | occipital, sternum, ribs, vertebrae, clavicle, subclavius, pectoralis.major, pectoralis.minor, serratus.anterior, rhomboid.minor, rhomboid.major                                                                                                                                                                             |
| 2 | TRUE | 1.00E-05 | middle.phalanx.2, middle.phalanx.3, middle.phalanx.4, middle.phalanx.5, distal.phalanx.2, distal.phalanx.3, distal.phalanx.4, distal.phalanx.5, flexor.digitorum.superficialis, flexor.digitorum.profundus, extensor.digitorum, extensor.digiti.minimi, extensor.indicis, lumbrical.1, lumbrical.2, lumbrical.3, lumbrical.4 |

|   |      |          |                                                                                                                                                                                                                                                                                                                                                                                                                                                                                                                                                           |
|---|------|----------|-----------------------------------------------------------------------------------------------------------------------------------------------------------------------------------------------------------------------------------------------------------------------------------------------------------------------------------------------------------------------------------------------------------------------------------------------------------------------------------------------------------------------------------------------------------|
| 3 | TRUE | 0        | trapezoid, trapezium, scaphoid, capitate, metacarpal.1, metacarpal.2, metacarpal.3, proximal.phalanx.1, proximal.phalanx.2, proximal.phalanx.3, distal.phalanx.1, flexor.carpi.radialis, flexor.pollicis.longus, extensor.carpi.radialis.longus, extensor.carpi.radialis.brevis, flexor.pollicis.longus, adductor.pollicis, adductor.pollicis.accessorius, flexor.brevis.profundus.2, abductor.pollicis.brevis, flexor.pollicis.brevis, opponens.pollicis, interosseus.dorsalis.1, interosseus.dorsalis.2, interosseus.dorsalis.3, interosseus.palmaris.1 |
| 4 | TRUE | 5.00E-05 | lunate, triquetrum, pisiform, hamate, metacarpal.4, metacarpal.5, proximal.phalanx.4, proximal.phalanx.5, flexor.carpi.ulnaris, opponens.digiti.minimi, flexor.digiti.minimi.brevis, abductor.digiti.minimi, interosseus.dorsalis.4, interosseus.palmaris.2, interosseus.palmaris.3                                                                                                                                                                                                                                                                       |
| 5 | TRUE | 1.00E-05 | scapula, humerus, radius, ulna, deltoid, supraspinatus, infraspinatus, teres.minor, teres.major, subscapularis, levator.scapulae, latissimus.dorsi, biceps.brachii, coracobrachialis, brachialis, triceps.brachii, anconeus, pronator.teres, palmaris.longus, pronator.quadratus, brachioradialis, extensor.carpi.ulnaris, supinator, abductor.pollicis.longus, extensor.pollicis.brevis                                                                                                                                                                  |

#### *Hylobates*

|   |      |          |                                                                                                                                                                                                                                                                                                                                                                                                                              |
|---|------|----------|------------------------------------------------------------------------------------------------------------------------------------------------------------------------------------------------------------------------------------------------------------------------------------------------------------------------------------------------------------------------------------------------------------------------------|
| 1 | TRUE | 0.00024  | triquetrum, pisiform, hamate, metacarpal.5, proximal.phalanx.5, middle.phalanx.5, distal.phalanx.5, flexor.carpi.ulnaris, lumbrical.4, contrahens.digitorum.5, interosseus.palmaris.3, flexor.digiti.minimi.brevis, opponens.digiti.minimi, abductor.digiti.minimi                                                                                                                                                           |
| 2 | TRUE | 0.00035  | occipital, vertebrae, ribs, sternum, clavicle, serratus.anterior, rhomboideus, levator.scapulae, levator.claviculae, subclavius, pectoralis.major, pectoralis.minor, latissimus.dorsi, dorsoepitrochlearis                                                                                                                                                                                                                   |
| 3 | TRUE | 8.00E-04 | scapula, humerus, radius, ulna, infraspinatus, supraspinatus, deltoideus., teres.minor, subscapularis, teres.major, triceps.brachii, brachialis, biceps.brachii, coracobrachialis, pronator.quadratus, flexor.digitorum.profundus, flexor.digitorum.superficialis, palmaris.longus, pronator.teres, brachioradialis, supinator, extensor.carpi.ulnaris, extensor.digitorum, extensor.digiti.minimi, abductor.pollicis.longus |
| 4 | TRUE | 0.00476  | metacarpal.4, proximal.phalanx.4, middle.phalanx.4, distal.phalanx.4, lumbrical.3, contrahens.digitorum.4, interosseus.palmaris.2, interosseus.dorsalis.4, interosseus.accessorius.4                                                                                                                                                                                                                                         |
| 5 | TRUE | 0.01416  | scaphoid, lunate, trapezium, trapezoid, centrale, capitate, metacarpal.1, metacarpal.2, flexor.carpi.radialis, adductor.pollicis, opponens.pollicis, extensor.carpi.radialis.longus, extensor.carpi.radialis.brevis, extensor.pollicis.brevis                                                                                                                                                                                |
| 6 | TRUE | 0.02728  | proximal.phalanx.1, distal.phalanx.1, flexor.pollicis.longus, flexor.brevis.profundus.2, flexor.pollicis.brevis, abductor.pollicis.brevis, extensor.pollicis.longus                                                                                                                                                                                                                                                          |
| 7 | TRUE | 0.01893  | metacarpal.3, proximal.phalanx.3, middle.phalanx.3, distal.phalanx.3, lumbrical.2, interosseus.dorsalis.2, interosseus.dorsalis.3, interosseus.accessorius.2, interosseus.accessorius.3, extensor.indicis                                                                                                                                                                                                                    |
| 8 | TRUE | 0.00425  | proximal.phalanx.2, middle.phalanx.2, distal.phalanx.2, lumbrical.1, contrahens.digitorum.2, interosseus.palmaris.1, interosseus.dorsalis.1, interosseus.accessorius.1                                                                                                                                                                                                                                                       |

#### *Lemur*

|   |      |         |                                                                                                                                                                                                                                                                                                                                                                                                                                                                                                                                                |
|---|------|---------|------------------------------------------------------------------------------------------------------------------------------------------------------------------------------------------------------------------------------------------------------------------------------------------------------------------------------------------------------------------------------------------------------------------------------------------------------------------------------------------------------------------------------------------------|
| 1 | TRUE | 0       | occipital, vertebrae, scapula, humerus, radius, ulna, rhomboideus.major, rhomboideus.occipitalis, levator.scapulae, levator.claviculae, panniculus.carnosus, infraspinatus, supraspinatus, deltoideus.scapularis, deltoideus.acromialis.et.clavicularis, teres.minor, subscapularis, teres.major, latissimus.dorsi, triceps.brachii, dorsoepitrochlearis, brachialis, biceps.brachii, coracobrachialis, pronator.quadratus, palmaris.longus, epitrochleoanconeus, pronator.teres, brachioradialis, supinator, extensor.carpi.ulnaris, anconeus |
| 2 | TRUE | 0.00267 | metacarpal.3, proximal.phalanx.3, metacarpal.4, proximal.phalanx.4, flexor.brevis.profundus.5, flexor.brevis.profundus.6, flexor.brevis.profundus.7, flexor.brevis.profundus.8, intermetacarpal.2, intermetacarpal.3, intermetacarpal.4, extensor.carpi.radialis.brevis                                                                                                                                                                                                                                                                        |
| 3 | TRUE | 0.00011 | scaphoid, lunate, trapezium, trapezoid, centrale, capitate, metacarpal.1, metacarpal.2, proximal.phalanx.2, flexor.carpi.radialis, contrahens.digitorum.2, flexor.brevis.profundus.3, flexor.brevis.profundus.4, intermetacarpal.1, opponens.pollicis, extensor.carpi.radialis.longus, abductor.pollicis.longus                                                                                                                                                                                                                                |

|   |      |         |                                                                                                                                                                                                                                                                                                                              |
|---|------|---------|------------------------------------------------------------------------------------------------------------------------------------------------------------------------------------------------------------------------------------------------------------------------------------------------------------------------------|
| 4 | TRUE | 0.05478 | proximal.phalanx.1, distal.phalanx.1, adductor.pollicis, flexor.brevis.profundus.2, flexor.pollicis.brevis, abductor.pollicis.brevis, extensor.pollicis.longus                                                                                                                                                               |
| 5 | TRUE | 0.01294 | triquetrum, pisiform, hamate, metacarpal.5, proximal.phalanx.5, flexor.carpi.ulnaris, contrahens.digitorum.5, flexor.brevis.profundus.9, flexor.digiti.minimi.brevis, opponens.digiti.minimi, abductor.digiti.minimi                                                                                                         |
| 6 | TRUE | 0       | middle.phalanx.2, distal.phalanx.2, middle.phalanx.3, distal.phalanx.3, middle.phalanx.4, distal.phalanx.4, middle.phalanx.5, distal.phalanx.5, flexor.digitorum.profundus, flexor.digitorum.superficialis, lumbrical.2, lumbrical.3, lumbrical.4, lumbrical.5, extensor.digitorum, extensor.digiti.minimi, extensor.indicis |
| 7 | TRUE | 0.00425 | ribs, sternum, clavicle, serratus.anterior, subclavius, pectoralis.major, pectoralis.minor                                                                                                                                                                                                                                   |

#### Loris

|    |      |          |                                                                                                                                                                                                                                                                                                                                                                                       |
|----|------|----------|---------------------------------------------------------------------------------------------------------------------------------------------------------------------------------------------------------------------------------------------------------------------------------------------------------------------------------------------------------------------------------------|
| 1  | TRUE | 0.01141  | proximal.phalanx.1, distal.phalanx.1, adductor.pollicis, flexor.brevis.profundus.2, flexor.pollicis.brevis, abductor.pollicis.brevis, extensor.pollicis.longus                                                                                                                                                                                                                        |
| 2  | TRUE | 0.02655  | occipital, vertebrae, rhomboideus.major, rhomboideus.occipitalis, levator.scapulae, levator.claviculae, latissimus.dorsi, dorsoepitrochlearis                                                                                                                                                                                                                                         |
| 3  | TRUE | 0.29318  | pisiform, proximal.phalanx.5, contrahens.digitorum.5, flexor.brevis.profundus.9, abductor.digiti.minimi                                                                                                                                                                                                                                                                               |
| 4  | TRUE | 3.00E-05 | scapula, humerus, radius, ulna, triquetrum, panniculus.carnosus, infraspinatus, supraspinatus, deltoideus., teres.minor, subscapularis, teres.major, triceps.brachii, brachialis, biceps.brachii, coracobrachialis, pronator.quadratus, palmaris.longus, flexor.carpi.ulnaris, pronator.teres, brachioradialis, supinator, extensor.carpi.ulnaris, anconeus, abductor.pollicis.longus |
| 5  | TRUE | 0.01649  | metacarpal.2, proximal.phalanx.2, middle.phalanx.2, lumbrical.1, contrahens.digitorum.2, flexor.brevis.profundus.3, flexor.brevis.profundus.4, intermetacarpal.1, interosseus.accessorius.2, extensor.carpi.radialis.longus                                                                                                                                                           |
| 6  | TRUE | 0.00415  | distal.phalanx.2, middle.phalanx.3, distal.phalanx.3, middle.phalanx.4, distal.phalanx.4, flexor.digitorum.profundus, flexor.digitorum.superficialis, lumbrical.2, lumbrical.3, interosseus.accessorius.4, extensor.digitorum, extensor.indicis                                                                                                                                       |
| 7  | TRUE | 0.01451  | scaphoid, lunate, trapezium, trapezoid, centrale, capitate, metacarpal.1, flexor.carpi.radialis, opponens.pollicis                                                                                                                                                                                                                                                                    |
| 8  | TRUE | 0.14534  | hamate, metacarpal.5, middle.phalanx.5, distal.phalanx.5, lumbrical.4, interosseus.accessorius.5, flexor.digiti.minimi.brevis, opponens.digiti.minimi, extensor.digiti.minimi                                                                                                                                                                                                         |
| 9  | TRUE | 0.01308  | ribs, sternum, clavicle, serratus.anterior, subclavius, pectoralis.major, pectoralis.minor                                                                                                                                                                                                                                                                                            |
| 10 | TRUE | 0.05589  | metacarpal.3, proximal.phalanx.3, flexor.brevis.profundus.5, flexor.brevis.profundus.6, intermetacarpal.2, interosseus.accessorius.3, extensor.carpi.radialis.brevis                                                                                                                                                                                                                  |
| 11 | TRUE | 0.03892  | metacarpal.4, proximal.phalanx.4, flexor.brevis.profundus.7, flexor.brevis.profundus.8, intermetacarpal.3, intermetacarpal.4                                                                                                                                                                                                                                                          |

#### Macaca

|   |      |          |                                                                                                                                                                                                                                                                                                                                                                                                                 |
|---|------|----------|-----------------------------------------------------------------------------------------------------------------------------------------------------------------------------------------------------------------------------------------------------------------------------------------------------------------------------------------------------------------------------------------------------------------|
| 1 | TRUE | 4.00E-05 | scaphoid, lunate, trapezium, accessory.on.trap, trapezoid, centrale, capitate, metacarpal.1, proximal.phalanx.1, distal.phalanx.1, adductor.pollicis, flexor.brevis.profundus.2, flexor.pollicis.brevis, opponens.pollicis, abductor.pollicis.brevis, extensor.pollicis.longus                                                                                                                                  |
| 2 | TRUE | 0.22086  | triquetrum, pisiform, hamate, metacarpal.5, flexor.carpi.ulnaris, opponens.digiti.minimi, abductor.digiti.minimi, extensor.carpi.ulnaris                                                                                                                                                                                                                                                                        |
| 3 | TRUE | 0        | scapula, humerus, radius, ulna, rhomboideus.minor, pectoralis.minor, panniculus.carnosus, infraspinatus, supraspinatus, teres.minor, subscapularis, teres.major, latissimus.dorsi, dorsoepitrochlearis, triceps.brachii, brachialis, biceps.brachii, coracobrachialis, pronator.quadratus, palmaris.longus, epitrochleoanconeus, pronator.teres, brachioradialis, supinator, anconeus, abductor.pollicis.longus |
| 4 | TRUE | 0.05085  | metacarpal.2, proximal.phalanx.2, flexor.carpi.radialis, contrahens.digitorum.2, flexor.brevis.profundus.3, flexor.brevis.profundus.4, intermetacarpal.1,                                                                                                                                                                                                                                                       |

| extensor.carpi.radialis.longus |      |         |                                                                                                                                                                                                                                                                                                                              |
|--------------------------------|------|---------|------------------------------------------------------------------------------------------------------------------------------------------------------------------------------------------------------------------------------------------------------------------------------------------------------------------------------|
| 5                              | TRUE | 0       | middle.phalanx.2, distal.phalanx.2, middle.phalanx.3, distal.phalanx.3, middle.phalanx.4, distal.phalanx.4, middle.phalanx.5, distal.phalanx.5, flexor.digitorum.profundus, flexor.digitorum.superficialis, lumbrical.1, lumbrical.2, lumbrical.3, lumbrical.4, extensor.digitorum, extensor.digiti.minimi, extensor.indicis |
| 6                              | TRUE | 0.16978 | occipital, vertebrae, rhomboideus.major, rhomboideus.occipitalis, levator.scapulae, levator.claviculae                                                                                                                                                                                                                       |
| 7                              | TRUE | 0.06901 | metacarpal.4, proximal.phalanx.4, contrahens.digitorum.4, flexor.brevis.profundus.7, flexor.brevis.profundus.8, intermetacarpal.4                                                                                                                                                                                            |
| 8                              | TRUE | 0.26785 | proximal.phalanx.5, contrahens.digitorum.5, flexor.brevis.profundus.9, flexor.digiti.minimi.brevis                                                                                                                                                                                                                           |
| 9                              | TRUE | 0.01401 | ribs, sternum, clavicle, serratus.anterior, subclavius, pectoralis.major, deltoideus.                                                                                                                                                                                                                                        |
| 10                             | TRUE | 0.02747 | metacarpal.3, proximal.phalanx.3, flexor.brevis.profundus.5, flexor.brevis.profundus.6, intermetacarpal.2, intermetacarpal.3, extensor.carpi.radialis.brevis                                                                                                                                                                 |

#### Mus

|   |      |          |                                                                                                                                                                                                                                                                                                                                                                                                                        |
|---|------|----------|------------------------------------------------------------------------------------------------------------------------------------------------------------------------------------------------------------------------------------------------------------------------------------------------------------------------------------------------------------------------------------------------------------------------|
| 1 | TRUE | 3.00E-04 | metacarpal.2, metacarpal.3, proximal.phalanx.2, proximal.phalanx.3, flexor.carpi.radialis, lumbrical.2, lumbrical.3, contrahens.digiti.2, flexor.brevis.profundus.3, flexor.brevis.profundus.4, flexor.brevis.profundus.5, flexor.brevis.profundus.6, intermetacarpal.1, intermetacarpal.2, intermetacarpal.3, extensor.carpi.radialis.longus, extensor.carpi.radialis.brevis                                          |
| 2 | TRUE | 0.00041  | trapezoid, trapezium, central.bone, scapholunate, falciform, capitata, metacarpal.1, proximal.phalanx.1, distal.phalanx.1, adductor.pollicis, flexor.pollicis.brevis, flexor.brevis.profundus.2, abductor.pollicis.brevis, abductor.pollicis.longus                                                                                                                                                                    |
| 3 | TRUE | 0.00057  | occipital, sternum, ribs, vertebrae, clavicle, serratus.anterior, rhomboideus.major, rhomboideus.minor, rhomboideus.occipitalis, levator.scapulae, levator.claviculae, subclavius, pectoralis.major, pectoralis.minor, panniculus.carnosus                                                                                                                                                                             |
| 4 | TRUE | 0.0112   | triquetrum, pisiform, hamate, metacarpal.5, proximal.phalanx.5, middle.phalanx.5, lumbrical.5, contrahens.digiti.5, flexor.brevis.profundus.9, flexor.digiti.minimi.brevis, opponens.digiti.minimi, abductor.digiti.minimi                                                                                                                                                                                             |
| 5 | TRUE | 0        | scapula, humerus, radius, ulna, infraspinatus, supraspinatus, deltoideus.scapularis, deltoideus.acromialis.et.clavicularis, teres.minor, subscapularis, teres.major, latissimus.dorsi, triceps.brachii, dorsoepitrochlearis, brachialis, biceps.brachii, coracobrachialis, pronator.quadratus, flexor.carpi.ulnaris, epitrochleoanconeus, pronator.teres, palmaris.brevis, supinator, extensor.carpi.ulnaris, anconeus |
| 6 | TRUE | 0.00021  | middle.phalanx.2, middle.phalanx.3, middle.phalanx.4, distal.phalanx.2, distal.phalanx.3, distal.phalanx.4, distal.phalanx.5, flexor.digitorum.profundus, flexor.digitorum.superficialis, palmaris.longus, extensor.digitorum, extensor.digiti.minimi, extensor.indicis                                                                                                                                                |
| 7 | TRUE | 0.02903  | metacarpal.4, proximal.phalanx.4, lumbrical.4, flexor.brevis.profundus.7, flexor.brevis.profundus.8, intermetacarpal.4                                                                                                                                                                                                                                                                                                 |

#### Nycticebus

|   |      |          |                                                                                                                                                                                                                                                                                                                                                                                                                  |
|---|------|----------|------------------------------------------------------------------------------------------------------------------------------------------------------------------------------------------------------------------------------------------------------------------------------------------------------------------------------------------------------------------------------------------------------------------|
| 1 | TRUE | 6.00E-05 | scaphoid, lunate, trapezium, trapezoid, centrale, capitata, hamate, metacarpal.1, metacarpal.2, proximal.phalanx.2, flexor.carpi.radialis, contrahens.digitorum.2, intercapitulares.1, flexor.brevis.profundus.3, flexor.brevis.profundus.4, intermetacarpal.1, interosseus.accessorius.2, opponens.pollicis, extensor.carpi.radialis.longus                                                                     |
| 2 | TRUE | 0.00041  | middle.phalanx.2, distal.phalanx.2, metacarpal.3, proximal.phalanx.3, middle.phalanx.3, distal.phalanx.3, flexor.digitorum.profundus, flexor.digitorum.superficialis, lumbrical.2, lumbrical.3, intercapitulares.2, intercapitulares.3, flexor.brevis.profundus.5, flexor.brevis.profundus.6, intermetacarpal.2, interosseus.accessorius.3, extensor.carpi.radialis.brevis, extensor.digitorum, extensor.indicis |
| 3 | TRUE | 0.0068   | metacarpal.5, proximal.phalanx.5, middle.phalanx.5, distal.phalanx.5, lumbrical.5, contrahens.digitorum.5, intercapitulares.4, flexor.brevis.profundus.9, interosseus.accessorius.5, flexor.digiti.minimi.brevis, opponens.digiti.minimi, abductor.digiti.minimi, extensor.digiti.minimi                                                                                                                         |
| 4 | TRUE | 0.00643  | proximal.phalanx.1, distal.phalanx.1, adductor.pollicis, flexor.brevis.profundus.2,                                                                                                                                                                                                                                                                                                                              |

|   |      |         |                                                                                                                                                                                                                                                                                                                                                                                                |
|---|------|---------|------------------------------------------------------------------------------------------------------------------------------------------------------------------------------------------------------------------------------------------------------------------------------------------------------------------------------------------------------------------------------------------------|
|   |      |         | flexor.pollicis.brevis, abductor.pollicis.brevis, extensor.pollicis.longus                                                                                                                                                                                                                                                                                                                     |
| 5 | TRUE | 0.02655 | occipital, vertebrae, rhomboideus.major, rhomboideus.occipitalis, levator.scapulae, levator.claviculae, latissimus.dorsi, dorsoepitrochlearis                                                                                                                                                                                                                                                  |
| 6 | TRUE | 0       | scapula, humerus, radius, ulna, triquetrum, pisiform, panniculus.carnosus, infraspinatus, supraspinatus, deltoideus, teres.minor, subscapularis, teres.major, triceps.brachii, brachialis, biceps.brachii, coracobrachialis, pronator.quadratus, palmaris.longus, flexor.carpi.ulnaris, pronator.teres, brachioradialis, supinator, extensor.carpi.ulnaris, anconeus, abductor.pollicis.longus |
| 7 | TRUE | 0.00298 | metacarpal.4, proximal.phalanx.4, middle.phalanx.4, distal.phalanx.4, lumbrical.4, flexor.brevis.profundus.7, flexor.brevis.profundus.8, intermetacarpal.3, intermetacarpal.4, interosseus.accessorius.4                                                                                                                                                                                       |
| 8 | TRUE | 0.01308 | ribs, sternum, clavicle, serratus.anterior, subclavius, pectoralis.major, pectoralis.minor                                                                                                                                                                                                                                                                                                     |

*Pan paniscus*

|   |      |          |                                                                                                                                                                                                                                                                                                                                                                                                           |
|---|------|----------|-----------------------------------------------------------------------------------------------------------------------------------------------------------------------------------------------------------------------------------------------------------------------------------------------------------------------------------------------------------------------------------------------------------|
| 1 | TRUE | 0.00026  | occipital, vertebrae, ribs, sternum, clavicle, serratus.anterior, rhomboideus, levator.scapulae, levator.claviculae, subclavius, pectoralis.major, pectoralis.minor, latissimus.dorsi                                                                                                                                                                                                                     |
| 2 | TRUE | 0.00017  | scaphoid, lunate, trapezoid, capitate, metacarpal.2, metacarpal.3, proximal.phalanx.3, middle.phalanx.3, distal.phalanx.3, flexor.carpi.radialis, lumbrical.2, flexor.brevis.profundus.5, flexor.brevis.profundus.6, intermetacarpal.2, intermetacarpal.3, extensor.carpi.radialis.longus, extensor.carpi.radialis.brevis                                                                                 |
| 3 | TRUE | 1.00E-04 | triquetrum, pisiform, hamate, metacarpal.5, proximal.phalanx.5, middle.phalanx.5, distal.phalanx.5, flexor.carpi.ulnaris, lumbrical.4, contrahens.digitorum.5, flexor.brevis.profundus.9, flexor.digiti.minimi.brevis, opponens.digiti.minimi, abductor.digiti.minimi, extensor.digiti.minimi                                                                                                             |
| 4 | TRUE | 0.00063  | scapula, humerus, radius, ulna, infraspinatus, supraspinatus, deltoideus., teres.minor, subscapularis, teres.major, dorsoepitrochlearis, triceps.brachii, brachialis, biceps.brachii, coracobrachialis, pronator.quadratus, flexor.digitorum.profundus, flexor.digitorum.superficialis, palmaris.longus, pronator.teres, brachioradialis, supinator, extensor.carpi.ulnaris, anconeus, extensor.digitorum |
| 5 | TRUE | 0.00122  | trapezium, metacarpal.1, proximal.phalanx.1, distal.phalanx.1, adductor.pollicis, flexor.brevis.profundus.2, flexor.pollicis.brevis, opponens.pollicis, abductor.pollicis.brevis, extensor.pollicis.longus, abductor.pollicis.longus                                                                                                                                                                      |
| 6 | TRUE | 0.00118  | metacarpal.4, proximal.phalanx.4, middle.phalanx.4, distal.phalanx.4, lumbrical.3, contrahens.digitorum.4, flexor.brevis.profundus.7, flexor.brevis.profundus.8, intermetacarpal.4                                                                                                                                                                                                                        |
| 7 | TRUE | 0.00058  | proximal.phalanx.2, middle.phalanx.2, distal.phalanx.2, lumbrical.1, flexor.brevis.profundus.3, flexor.brevis.profundus.4, intermetacarpal.1, extensor.indicis                                                                                                                                                                                                                                            |

*Pan troglodytes*

|   |      |         |                                                                                                                                                                                                                                                                            |
|---|------|---------|----------------------------------------------------------------------------------------------------------------------------------------------------------------------------------------------------------------------------------------------------------------------------|
| 1 | TRUE | 0.00106 | trapezium, metacarpal.1, proximal.phalanx.1, distal.phalanx.1, adductor.pollicis, flexor.brevis.profundus.2, flexor.pollicis.brevis, opponens.pollicis, abductor.pollicis.brevis, extensor.pollicis.longus, abductor.pollicis.longus                                       |
| 2 | TRUE | 0.16804 | occipital, vertebrae, rhomboideus, levator.scapulae, levator.claviculae, latissimus.dorsi, dorsoepitrochlearis                                                                                                                                                             |
| 3 | TRUE | 0.02433 | ribs, sternum, clavicle, serratus.anterior, subclavius, pectoralis.major, pectoralis.minor                                                                                                                                                                                 |
| 4 | TRUE | 0.31959 | triquetrum, pisiform, hamate, metacarpal.5, flexor.carpi.ulnaris, flexor.digiti.minimi.brevis, opponens.digiti.minimi                                                                                                                                                      |
| 5 | TRUE | 0.04763 | humerus, radius, ulna, triceps.brachii, brachialis, pronator.quadratus, flexor.digitorum.profundus, flexor.digitorum.superficialis, palmaris.longus, epitrochleoanconeus, pronator.teres, brachioradialis, supinator, extensor.carpi.ulnaris, anconeus, extensor.digitorum |
| 6 | TRUE | 0.3255  | scaphoid, lunate, trapezoid, capitate, metacarpal.2, metacarpal.3, flexor.carpi.radialis, extensor.carpi.radialis.longus, extensor.carpi.radialis.brevis                                                                                                                   |
| 7 | TRUE | 0.70666 | scapula, infraspinatus, supraspinatus, deltoideus., teres.minor, subscapularis, teres.major,                                                                                                                                                                               |



|    |      |         |                                                                                                                                                                                    |
|----|------|---------|------------------------------------------------------------------------------------------------------------------------------------------------------------------------------------|
|    |      |         | biceps.brachii, coracobrachialis                                                                                                                                                   |
| 8  | TRUE | 0.00118 | metacarpal.4, proximal.phalanx.4, middle.phalanx.4, distal.phalanx.4, lumbrical.3, contrahens.digitorum.4, flexor.brevis.profundus.7, flexor.brevis.profundus.8, intermetacarpal.4 |
| 9  | TRUE | 0.00074 | proximal.phalanx.5, middle.phalanx.5, distal.phalanx.5, lumbrical.4, contrahens.digitorum.5, flexor.brevis.profundus.9, abductor.digiti.minimi, extensor.digiti.minimi             |
| 10 | TRUE | 0.00058 | proximal.phalanx.2, middle.phalanx.2, distal.phalanx.2, lumbrical.1, flexor.brevis.profundus.3, flexor.brevis.profundus.4, intermetacarpal.1, extensor.indicis                     |
| 11 | TRUE | 0.00032 | proximal.phalanx.3, middle.phalanx.3, distal.phalanx.3, lumbrical.2, flexor.brevis.profundus.5, flexor.brevis.profundus.6, intermetacarpal.2, intermetacarpal.3                    |

#### Papio

|    |      |         |                                                                                                                                                                                                                                                                                                                                                                                                            |
|----|------|---------|------------------------------------------------------------------------------------------------------------------------------------------------------------------------------------------------------------------------------------------------------------------------------------------------------------------------------------------------------------------------------------------------------------|
| 1  | TRUE | 0       | scapula, humerus, radius, ulna, rhomboideus.minor, panniculus.carnosus, infraspinatus, supraspinatus, deltoideus., teres.minor, subscapularis, teres.major, latissimus.dorsi, dorsoepitrochlearis, triceps.brachii, brachialis, biceps.brachii, coracobrachialis, pronator.quadratus, palmaris.longus, epitrochleoanconeus, pronator.teres, brachioradialis, supinator, anconeus, abductor.pollicis.longus |
| 2  | TRUE | 0.04983 | hamate, metacarpal.5, proximal.phalanx.5, contrahens.digitorum.5, flexor.brevis.profundus.9, flexor.digiti.minimi.brevis, opponens.digiti.minimi, abductor.digiti.minimi, extensor.carpi.ulnaris                                                                                                                                                                                                           |
| 3  | TRUE | 0.09609 | metacarpal.2, proximal.phalanx.2, flexor.carpi.radialis, contrahens.digitorum.2, flexor.brevis.profundus.3, flexor.brevis.profundus.4, intermetacarpal.1, extensor.carpi.radialis.longus                                                                                                                                                                                                                   |
| 4  | TRUE | 0       | middle.phalanx.2, distal.phalanx.2, middle.phalanx.3, distal.phalanx.3, middle.phalanx.4, distal.phalanx.4, middle.phalanx.5, distal.phalanx.5, flexor.digitorum.profundus, flexor.digitorum.superficialis, lumbrical.1, lumbrical.2, lumbrical.3, lumbrical.4, extensor.digitorum, extensor.digiti.minimi, extensor.indicis                                                                               |
| 5  | TRUE | 0.07827 | proximal.phalanx.1, distal.phalanx.1, adductor.pollicis, flexor.brevis.profundus.2, flexor.pollicis.brevis, abductor.pollicis.brevis, extensor.pollicis.longus                                                                                                                                                                                                                                             |
| 6  | TRUE | 0.16978 | occipital, vertebrae, rhomboideus.major, rhomboideus.occipitalis, levator.scapulae, levator.claviculae                                                                                                                                                                                                                                                                                                     |
| 7  | TRUE | 0.06901 | metacarpal.4, proximal.phalanx.4, contrahens.digitorum.4, flexor.brevis.profundus.7, flexor.brevis.profundus.8, intermetacarpal.4                                                                                                                                                                                                                                                                          |
| 8  | TRUE | 0.10223 | scaphoid, lunate, triquetrum, pisiform, trapezoid, centrale, capitata, flexor.carpi.ulnaris                                                                                                                                                                                                                                                                                                                |
| 9  | TRUE | 0.01731 | ribs, sternum, clavicle, serratus.anterior, subclavius, pectoralis.major, pectoralis.minor                                                                                                                                                                                                                                                                                                                 |
| 10 | TRUE | 0.03178 | metacarpal.3, proximal.phalanx.3, flexor.brevis.profundus.5, flexor.brevis.profundus.6, intermetacarpal.2, intermetacarpal.3, extensor.carpi.radialis.brevis                                                                                                                                                                                                                                               |
| 11 | TRUE | 0.44047 | trapezium, accessory.on.trap, metacarpal.1, opponens.pollicis                                                                                                                                                                                                                                                                                                                                              |

#### Pithecia

|   |      |   |                                                                                                                                                                                                                                                                                                                                                                                                                                                                                                                                                                  |
|---|------|---|------------------------------------------------------------------------------------------------------------------------------------------------------------------------------------------------------------------------------------------------------------------------------------------------------------------------------------------------------------------------------------------------------------------------------------------------------------------------------------------------------------------------------------------------------------------|
| 1 | TRUE | 0 | scaphoid, lunate, trapezium, accessory.on.trap, trapezoid, centrale, capitata, metacarpal.1, proximal.phalanx.1, metacarpal.2, proximal.phalanx.2, metacarpal.3, proximal.phalanx.3, flexor.carpi.radialis, contrahens.digitorum.2, adductor.pollicis, interosseus.dorsalis.1, interosseus.dorsalis.2, interosseus.dorsalis.3, interosseus.palmaris.1, flexor.pollicis.brevis, opponens.pollicis, abductor.pollicis.brevis, extensor.carpi.radialis.longus, extensor.carpi.radialis.brevis                                                                       |
| 2 | TRUE | 0 | occipital, vertebrae, ribs, sternum, scapula, clavicle, humerus, radius, ulna, serratus.anterior, rhomboideus, rhomboideus.occipitalis, levator.scapulae, levator.claviculae, subclavius, pectoralis.major, pectoralis.minor, infraspinatus, supraspinatus, deltoideus., teres.minor, subscapularis, teres.major, latissimus.dorsi, dorsoepitrochlearis, triceps.brachii, brachialis, biceps.brachii, coracobrachialis, pronator.quadratus, palmaris.longus, epitrochleoanconeus, pronator.teres, brachioradialis, supinator, anconeus, abductor.pollicis.longus |

|   |      |         |                                                                                                                                                                                                                                                                                                                                                                          |
|---|------|---------|--------------------------------------------------------------------------------------------------------------------------------------------------------------------------------------------------------------------------------------------------------------------------------------------------------------------------------------------------------------------------|
| 3 | TRUE | 0.00042 | triquetrum, pisiform, hamate, metacarpal.4, proximal.phalanx.4, metacarpal.5, proximal.phalanx.5, flexor.carpi.ulnaris, contrahens.digitorum.4, contrahens.digitorum.5, interosseus.dorsalis.4, interosseus.palmaris.2, interosseus.palmaris.3, flexor.digiti.minimi.brevis, opponens.digiti.minimi, abductor.digiti.minimi, extensor.carpi.ulnaris                      |
| 4 | TRUE | 0       | distal.phalanx.1, middle.phalanx.2, distal.phalanx.2, middle.phalanx.3, distal.phalanx.3, middle.phalanx.4, distal.phalanx.4, middle.phalanx.5, distal.phalanx.5, flexor.digitorum.profundus, flexor.digitorum.superficialis, lumbrical.1, lumbrical.2, lumbrical.3, lumbrical.4, extensor.digitorum, extensor.digiti.minimi, extensor.indicis, extensor.pollicis.longus |

*Pongo*

|   |      |          |                                                                                                                                                                                                                                                                                                                                                                                                                                 |
|---|------|----------|---------------------------------------------------------------------------------------------------------------------------------------------------------------------------------------------------------------------------------------------------------------------------------------------------------------------------------------------------------------------------------------------------------------------------------|
| 1 | TRUE | 0        | triquetrum, pisiform, hamate, metacarpal.4, proximal.phalanx.4, middle.phalanx.4, distal.phalanx.4, metacarpal.5, proximal.phalanx.5, middle.phalanx.5, distal.phalanx.5, flexor.digitorum.profundus, lumbrical.3, lumbrical.4, interosseus.palmaris.2, interosseus.palmaris.3, interosseus.dorsalis.4, flexor.digiti.minimi.brevis, opponens.digiti.minimi, abductor.digiti.minimi, extensor.digitorum, extensor.digiti.minimi |
| 2 | TRUE | 0.02011  | occipital, vertebrae, scapula, rhomboideus, rhomboideus.occipitalis, levator.scapulae, infraspinatus, supraspinatus, deltoideus., teres.minor, subscapularis, teres.major, latissimus.dorsi, dorsoepitrochlearis, biceps.brachii, coracobrachialis                                                                                                                                                                              |
| 3 | TRUE | 0.00025  | humerus, radius, ulna, scaphoid, lunate, trapezoid, centrale, capitata, metacarpal.2, metacarpal.3, triceps.brachii, brachialis, pronator.quadratus, flexor.digitorum.superficialis, palmaris.longus, flexor.carpi.ulnaris, flexor.carpi.radialis, pronator.teres, extensor.carpi.radialis.longus, extensor.carpi.radialis.brevis, brachioradialis, supinator, extensor.carpi.ulnaris, anconeus                                 |
| 4 | TRUE | 1.00E-05 | proximal.phalanx.2, middle.phalanx.2, distal.phalanx.2, proximal.phalanx.3, middle.phalanx.3, distal.phalanx.3, lumbrical.1, lumbrical.2, interosseus.palmaris.1, interosseus.dorsalis.1, interosseus.dorsalis.2, interosseus.dorsalis.3, extensor.indicis                                                                                                                                                                      |
| 5 | TRUE | 0.00046  | trapezium, metacarpal.1, proximal.phalanx.1, distal.phalanx.1, adductor.pollicis, flexor.brevis.profundus.2, flexor.pollicis.brevis, opponens.pollicis, abductor.pollicis.brevis, extensor.pollicis.longus, abductor.pollicis.longus                                                                                                                                                                                            |
| 6 | TRUE | 0.01207  | ribs, sternum, clavicle, serratus.anterior, levator.claviculae, subclavius, pectoralis.major, pectoralis.minor                                                                                                                                                                                                                                                                                                                  |

*Propithecus*

|   |      |         |                                                                                                                                                                                                                                                                                                                                                                                      |
|---|------|---------|--------------------------------------------------------------------------------------------------------------------------------------------------------------------------------------------------------------------------------------------------------------------------------------------------------------------------------------------------------------------------------------|
| 1 | TRUE | 0.00148 | occipital, vertebrae, ribs, sternum, clavicle, serratus.anterior, rhomboideus.major, levator.scapulae, levator.claviculae, subclavius, pectoralis.major, pectoralis.minor                                                                                                                                                                                                            |
| 2 | TRUE | 0.00267 | metacarpal.3, proximal.phalanx.3, metacarpal.4, proximal.phalanx.4, flexor.brevis.profundus.5, flexor.brevis.profundus.6, flexor.brevis.profundus.7, flexor.brevis.profundus.8, intermetacarpal.2, intermetacarpal.3, intermetacarpal.4, extensor.carpi.radialis.brevis                                                                                                              |
| 3 | TRUE | 0.00015 | scaphoid, lunate, trapezium, accessory.on.trap, trapezoid, centrale, capitata, metacarpal.1, metacarpal.2, proximal.phalanx.2, flexor.carpi.radialis, contrahens.digitorum.2, flexor.brevis.profundus.3, flexor.brevis.profundus.4, intermetacarpal.1, opponens.pollicis, extensor.carpi.radialis.longus, abductor.pollicis.longus                                                   |
| 4 | TRUE | 0.01546 | triquetrum, pisiform, hamate, metacarpal.5, proximal.phalanx.5, flexor.carpi.ulnaris, contrahens.digitorum.5, flexor.brevis.profundus.9, flexor.digiti.minimi.brevis, opponens.digiti.minimi, abductor.digiti.minimi                                                                                                                                                                 |
| 5 | TRUE | 0.02739 | proximal.phalanx.1, distal.phalanx.1, adductor.pollicis, flexor.brevis.profundus.2, flexor.pollicis.brevis, abductor.pollicis.brevis, extensor.pollicis.longus                                                                                                                                                                                                                       |
| 6 | TRUE | 0       | scapula, humerus, radius, ulna, panniculus.carnosus, infraspinatus, supraspinatus, deltoideus, teres.minor, subscapularis, teres.major, latissimus.dorsi, triceps.brachii, dorsoepitrochlearis, brachialis, biceps.brachii, coracobrachialis, pronator.quadratus, palmaris.longus, epitrochleoanconeus, pronator.teres, brachioradialis, supinator, extensor.carpi.ulnaris, anconeus |
| 7 | TRUE | 0       | middle.phalanx.2, distal.phalanx.2, middle.phalanx.3, distal.phalanx.3, middle.phalanx.4, distal.phalanx.4, middle.phalanx.5, distal.phalanx.5, flexor.digitorum.profundus, flexor.digitorum.superficialis, lumbrical.2, lumbrical.3, lumbrical.4, lumbrical.5, extensor.digitorum,                                                                                                  |

extensor.digiti.minimi, extensor.indicis

*Saimiri*

|   |      |          |                                                                                                                                                                                                                                                                                                                                                                               |
|---|------|----------|-------------------------------------------------------------------------------------------------------------------------------------------------------------------------------------------------------------------------------------------------------------------------------------------------------------------------------------------------------------------------------|
| 1 | TRUE | 0.00196  | hamate, metacarpal.4, proximal.phalanx.4, metacarpal.5, proximal.phalanx.5, contrahens.digitorum.4, contrahens.digitorum.5, interosseus.dorsalis.4, interosseus.palmaris.2, interosseus.palmaris.3, flexor.digiti.minimi.brevis, opponens.digiti.minimi, extensor.carpi.ulnaris                                                                                               |
| 2 | TRUE | 1.00E-05 | scaphoid, lunate, trapezium, centrale, trapezoid, capitata, metacarpal.1, metacarpal.2, proximal.phalanx.2, metacarpal.3, proximal.phalanx.3, flexor.carpi.radialis, contrahens.digitorum.2, interosseus.dorsalis.1, interosseus.dorsalis.2, interosseus.dorsalis.3, interosseus.palmaris.1, opponens.policis, extensor.carpi.radialis.longus, extensor.carpi.radialis.brevis |
| 3 | TRUE | 0        | occipital, vertebrae, ribs, sternum, scapula, clavicle, serratus.anterior, rhomboideus, rhomboideus.occipitalis, levator.scapulae, levator.claviculae, subclavius, pectoralis.major, pectoralis.minor, infraspinatus, supraspinatus, deltoideus., teres.minor, subscapularis, teres.major, latissimus.dorsi, dorsoepitrochlearis, coracobrachialis                            |
| 4 | TRUE | 0.00028  | humerus, radius, ulna, triquetrum, pisiform, panniculus.carnosus, triceps.brachii, brachialis, biceps.brachii, pronator.quadratus, palmaris.longus, flexor.carpi.ulnaris, epitrochleanconeus, pronator.teres, abductor.digiti.minimi, brachioradialis, supinator, anconeus, abductor.policis.longus                                                                           |
| 5 | TRUE | 0        | distal.phalanx.1, middle.phalanx.2, distal.phalanx.2, middle.phalanx.3, distal.phalanx.3, middle.phalanx.4, distal.phalanx.4, middle.phalanx.5, distal.phalanx.5, flexor.digitorum.profundus, flexor.digitorum.superficialis, lumbrical.1, lumbrical.2, lumbrical.3, lumbrical.4, extensor.digitorum, extensor.digiti.minimi, extensor.indicis, extensor.policis.longus       |
| 6 | TRUE | 0.30992  | proximal.phalanx.1, adductor.policis, flexor.policis.brevis, abductor.policis.brevis                                                                                                                                                                                                                                                                                          |

*Tarsius*

|   |      |          |                                                                                                                                                                                                                                                                                                                                                                                                                                               |
|---|------|----------|-----------------------------------------------------------------------------------------------------------------------------------------------------------------------------------------------------------------------------------------------------------------------------------------------------------------------------------------------------------------------------------------------------------------------------------------------|
| 1 | TRUE | 8.00E-05 | triquetrum, pisiform, hamate, metacarpal.4, proximal.phalanx.4, metacarpal.5, proximal.phalanx.5, flexor.carpi.ulnaris, contrahens.digitorum.4, contrahens.digitorum.5, flexor.brevis.profundus.7, flexor.brevis.profundus.8, flexor.brevis.profundus.9, intermetacarpal.4, flexor.digiti.minimi.brevis, opponens.digiti.minimi, abductor.digiti.minimi                                                                                       |
| 2 | TRUE | 0.00102  | occipital, vertebrae, ribs, sternum, clavicle, serratus.anterior, rhomboideus.major, rhomboideus.occipitalis, levator.scapulae, levator.claviculae, subclavius, pectoralis.major, pectoralis.minor, latissimus.dorsi                                                                                                                                                                                                                          |
| 3 | TRUE | 3.00E-05 | scaphoid, lunate, trapezium, trapezoid, centrale, capitata, metacarpal.2, proximal.phalanx.2, metacarpal.3, proximal.phalanx.3, flexor.carpi.radialis, contrahens.digitorum.2, contrahens.digitorum.3, flexor.brevis.profundus.3, flexor.brevis.profundus.4, flexor.brevis.profundus.5, flexor.brevis.profundus.6, intermetacarpal.1, intermetacarpal.2, intermetacarpal.3, extensor.carpi.radialis.longus, extensor.carpi.radialis.brevis    |
| 4 | TRUE | 0        | middle.phalanx.2, distal.phalanx.2, middle.phalanx.3, distal.phalanx.3, middle.phalanx.4, distal.phalanx.4, middle.phalanx.5, distal.phalanx.5, flexor.digitorum.profundus, flexor.digitorum.superficialis, lumbrical.1, lumbrical.2, lumbrical.3, lumbrical.4, contrahens.digitorum.6, contrahens.digitorum.7, contrahens.digitorum.8, contrahens.digitorum.9, extensor.digitorum, extensor.digiti.minimi, extensor.indicis                  |
| 5 | TRUE | 0        | scapula, humerus, radius, ulna, panniculus.carnosus, infraspinatus, supraspinatus, deltoideus.scapularis., deltoideus.acromialis.et.clavicularis, teres.minor, subscapularis, teres.major, triceps.brachii, dorsoepitrochlearis, brachialis, biceps.brachii, coracobrachialis, pronator.quadratus, palmaris.longus, epitrochleanconeus, pronator.teres, brachioradialis, supinator, extensor.carpi.ulnaris, anconeus, abductor.policis.longus |
| 6 | TRUE | 0.02051  | metacarpal.1, proximal.phalanx.1, distal.phalanx.1, adductor.policis, flexor.brevis.profundus.2, flexor.policis.brevis, opponens.policis, abductor.policis.brevis, extensor.policis.longus                                                                                                                                                                                                                                                    |

*Tupaia*

|   |      |   |                                                                                                                                                                                                                                                                                                                                                                                                                    |
|---|------|---|--------------------------------------------------------------------------------------------------------------------------------------------------------------------------------------------------------------------------------------------------------------------------------------------------------------------------------------------------------------------------------------------------------------------|
| 1 | TRUE | 0 | scapholunate, triquetrum, pisiform, trapezium, centrale, trapezoid, capitata, hamate, metacarpal.1, proximal.phalanx.1, distal.phalanx.1, metacarpal.2, metacarpal.3, metacarpal.4, flexor.carpi.ulnaris, flexor.carpi.radialis, flexor.brevis.digitorum.manus, adductor.policis, flexor.policis.brevis, abductor.policis.brevis, extensor.carpi.radialis.brevis, extensor.policis.longus, abductor.policis.longus |
|---|------|---|--------------------------------------------------------------------------------------------------------------------------------------------------------------------------------------------------------------------------------------------------------------------------------------------------------------------------------------------------------------------------------------------------------------------|

|   |      |         |                                                                                                                                                                                                                                                                                                                                                                                                                                                                        |
|---|------|---------|------------------------------------------------------------------------------------------------------------------------------------------------------------------------------------------------------------------------------------------------------------------------------------------------------------------------------------------------------------------------------------------------------------------------------------------------------------------------|
| 2 | TRUE | 0       | middle.phalanx.2, distal.phalanx.2, middle.phalanx.3, distal.phalanx.3, middle.phalanx.4, distal.phalanx.4, middle.phalanx.5, distal.phalanx.5, flexor.digitorum.profundus, flexor.digitorum.superficialis, lumbrical.1, lumbrical.2, lumbrical.3, lumbrical.4, extensor.digitorum, extensor.digiti.minimi, extensor.indicis                                                                                                                                           |
| 3 | TRUE | 0.16677 | occipital, vertebrae, rhomboideus.major, rhomboideus.minor, rhomboideus.occipitalis, levator.scapulae, levator.claviculae, Atlantoscapularis.posticus.                                                                                                                                                                                                                                                                                                                 |
| 4 | TRUE | 0       | scapula, humerus, radius, ulna, panniculus.carnosus, infraspinatus, supraspinatus, deltoideus.scapularis, deltoideus.acromialis.et.clavicularis, teres.minor, subscapularis, teres.major, latissimus.dorsi, triceps.brachii, dorsoepitrochlearis, brachialis, biceps.brachii, coracobrachialis, pronator.quadratus, palmaris.longus, epitrochleoanconeus, pronator.teres, extensor.carpi.radialis.longus, brachioradialis, supinator, extensor.carpi.ulnaris, anconeus |
| 5 | TRUE | 0.12345 | metacarpal.5, proximal.phalanx.5, contrahens.digitorum.5, interosseus.palmaris.3, flexor.digiti.minimi.brevis, abductor.digiti.minimi                                                                                                                                                                                                                                                                                                                                  |
| 6 | TRUE | 0.01139 | ribs, sternum, clavicle, serratus.anterior, subclavius, pectoralis.major, pectoralis.minor                                                                                                                                                                                                                                                                                                                                                                             |
| 7 | TRUE | 0.21784 | proximal.phalanx.2, contrahens.digitorum.2, interosseus.dorsalis.1, interosseus.palmaris.1                                                                                                                                                                                                                                                                                                                                                                             |
| 8 | TRUE | 0.32655 | proximal.phalanx.3, interosseus.dorsalis.2, interosseus.dorsalis.3                                                                                                                                                                                                                                                                                                                                                                                                     |
| 9 | TRUE | 0.32655 | proximal.phalanx.4, interosseus.dorsalis.4, interosseus.palmaris.2                                                                                                                                                                                                                                                                                                                                                                                                     |
